## Signatures of Cysteine Oxidation on Muscle Structural and Contractile Proteins Are

### Associated with Physical Performance and Muscle Function in Older Adults: Study of

### Muscle, Mobility and Aging (SOMMA)

Nicholas J. Day<sup>1#</sup>, Shane S. Kelly<sup>1#</sup>, Li-Yung Lui<sup>2</sup>, Tyler A. Mansfield<sup>2</sup>, Matthew J. Gaffrey<sup>1</sup>, Jesse B. Trejo<sup>1</sup>, Tyler J. Sagendorf<sup>1</sup>, Kwame Attah<sup>1</sup>, Ronald J. Moore<sup>1</sup>, Collin M. Douglas<sup>3</sup>, Anne B. Newman<sup>4</sup>, Stephen B. Kritchevsky<sup>5</sup>, Philip A. Kramer<sup>5</sup>, David J. Marcinek<sup>6</sup>, Paul M. Coen<sup>7</sup>, Bret H. Goodpaster<sup>7</sup>, Russell T. Hepple<sup>8</sup>, Peggy M. Cawthon<sup>2,9</sup>, Vladislav A. Petyuk<sup>1</sup>, Karyn A. Esser<sup>3</sup>, Wei-Jun Qian<sup>1\*</sup>, Steven R. Cummings<sup>2,9\*</sup>

1

<sup>1</sup>Biological Sciences Division, Pacific Northwest National Laboratory, Richland, Washington, USA

<sup>2</sup>San Francisco Coordinating Center, California Pacific Medical Center Research Institute, San Francisco, California, USA

<sup>3</sup>Department of Physiology, University of Florida College of Medicine, Gainesville, Florida, USA

<sup>4</sup>Department of Epidemiology, University of Pittsburgh, Pittsburgh, Pennsylvania, USA

<sup>5</sup>Department of Internal Medicine-Gerontology and Geriatric Medicine, Wake Forest University School of Medicine, Winston-Salem, North Carolina, USA

<sup>6</sup>Department of Radiology, University of Washington, Seattle, Washington, USA

<sup>7</sup>Translational Research Institute, AdventHealth, Orlando, Florida, USA

<sup>8</sup>Department of Physical Therapy, University of Florida College of Medicine, Gainesville, Florida, USA

<sup>9</sup>Department of Epidemiology and Biostatistics, University of California, San Francisco, USA

**Running Title:** Cysteine oxidation associated with muscle function

**Keywords:** Muscle, Power, Fitness, Cysteine oxidation, Post-translational modifications, Redox

# These authors contributed equally to this work.

#### \*Corresponding authors:

Wei-Jun Qian, Ph.D.

2 Biological Sciences Division,  
3 Pacific Northwest National Laboratory,  
4 Richland, WA 99352  
5 Weijun.qian@pnnl.gov  
6 Phone: (509) 371-6572

7

8 Steven R. Cummings, M.D.,  
9 San Francisco Coordinating Center,  
10 California Pacific Medical Center Research Institute,  
11 San Francisco, CA 94143  
12 [steven.cummings@sfcc-cpmc.net](mailto:steven.cummings@sfcc-cpmc.net)  
13

14 **Abstract**

15 Oxidative stress is considered a contributor to declining muscle function and mobility during  
16 aging; however, the underlying molecular mechanisms remain poorly described. We  
17 hypothesized that greater levels of cysteine (Cys) oxidation on muscle proteins are associated  
18 with decreased measures of mobility. Herein, we applied a novel redox proteomics approach to  
19 measure reversible protein Cys oxidation in vastus lateralis muscle biopsies collected from 56  
20 subjects in the Study of Muscle, Mobility and Aging (SOMMA), a community-based cohort  
21 study of individuals aged 70 years and older. We tested whether levels of Cys oxidation on key  
22 muscle proteins involved in muscle structure and contraction were associated with muscle  
23 function (leg power and strength), walking speed, and fitness (VO<sub>2</sub> peak on cardiopulmonary  
24 exercise testing) using linear regression models adjusted for age, sex, and body weight. Higher  
25 oxidation levels of select nebulin Cys sites were associated with lower VO<sub>2</sub> peak, while greater  
26 oxidation of myomesin-1, myomesin-2, and nebulin Cys sites was associated with slower  
27 walking speed. Higher oxidation of Cys sites in key proteins such as myomesin-2, alpha-actinin-  
28 2, and skeletal muscle alpha-actin were associated with lower leg power and strength. We also  
29 observed an unexpected correlation ( $r = 0.48$ ) between a higher oxidation level of 8 Cys sites in  
30 alpha-actinin-3 and stronger leg power. Despite this observation, the results generally support the  
31 hypothesis that Cys oxidation of muscle proteins impair muscle power and strength, walking  
32 speed, and cardiopulmonary fitness with aging.

33

34

35

## 36 **1. Introduction**

37 Aging is associated with diminished muscle and physical function which leads to  
38 mobility disability, loss of independence, and poorer quality of life (de Vries et al., 2012).  
39 However, the underlying molecular changes contributing to a decline in muscle function and  
40 physical performance remain unclear. In muscle, mitochondria and enzymes like NADPH  
41 Oxidases (NOX) generate reactive oxygen species (ROS) such as superoxide radical ( $O_2^{\bullet-}$ ) and  
42 hydrogen peroxide ( $H_2O_2$ ) (Bouviere et al., 2021). Studies have shown that ROS are important  
43 signaling molecules for underlying muscle function, including modulation of glucose transport  
44 (Henríquez-Olguin et al., 2019), insulin sensitivity (Xirouchaki et al., 2021), and mitochondrial  
45 function (Kramer, Duan, Qian, & Marcinek, 2015). Indeed, oxidants produced during exercise  
46 are essential for the exercise adaptive response, improving antioxidant capacity, and  
47 mitochondrial biogenesis (Powers et al., 2020). However, excessive or chronic exposure to ROS  
48 associated with aging causes fatigue, reduced contractile function of muscles, and blunted  
49 adaptive signaling (Andrade, Reid, Allen, & Westerblad, 1998; Musci, Hamilton, & Linden,  
50 2019).

51 Excess production of ROS and diminished antioxidant capacity leads to a redox  
52 imbalance, also known as “oxidative stress”, which contributes to the etiology of many age  
53 associated pathologies (Sies, 2020). However, research in recent decades has shown that the  
54 concept of ROS-induced “oxidative damage” is a limited view of ROS and aging (Gladyshev,  
55 2014). The original concept of ROS-based “damage” is really a potentially reversible “oxidative  
56 modification” that alters mechanisms of physiological response and functional regulation, rather  
57 than causing dysfunction and degeneration. Consequently, the “redox stress” hypothesis has  
58 emerged as a theory to explain the relationship between ROS and aging and posits that a shift to

59 a more pro-oxidizing redox state is a causal effect of the aging process (Sohal & Orr, 2012). At  
60 the molecular level, ROS-mediated redox signaling can occur through reversible post-  
61 translational modifications (PTMs) of the thiol group on protein cysteine residues (Brandes,  
62 Schmitt, & Jakob, 2009). These redox PTMs modulate the activity, function, localization, and  
63 binding interactions of proteins, and their reversibility enables “switch”-like behavior for  
64 transient signaling roles (Brandes et al., 2009). Reversible PTMs on protein cysteine thiols have  
65 been increasingly considered as a major regulatory mechanism in oxidative stress-related  
66 diseases and aging (Kehm, Baldensperger, Raupbach, & Höhn, 2021).

67 Mitochondrial dysfunction has been considered a hallmark of aging (López-Otín, Blasco,  
68 Partridge, Serrano, & Kroemer, 2023). This situation enhances the production of ROS in aging  
69 tissues, resulting in a propensity towards an increasingly pro-oxidizing redox state, leading to  
70 “redox stress”. The duality of ROS as both essential, but potentially detrimental for biological  
71 functions makes it of particular interest for studying the intersection of aging and muscle  
72 function, however identification of proteins that are modified by ROS in human aging muscle  
73 has not been investigated. The sarcomere is the fundamental contractile unit in muscle that is  
74 responsible for generating force. Research over the last 30 years has demonstrated that the force  
75 capacity of the sarcomere is an emergent property of all the proteins that contribute to the  
76 structure (Lehman, Crocini, & Leinwand, 2022). Consequently, changes or mutations in any one  
77 protein are sufficient to impact the function of the structure, such as those comprising the thick  
78 and thin filaments or the Z- and M-lines.

79 We hypothesize that the levels of cysteine oxidation on sarcomere proteins involved in  
80 muscle contraction and structure are associated with physical performance (walking speed),  
81 muscle function (leg strength and leg power), and cardiopulmonary fitness (VO<sub>2</sub> peak). Previous

82 studies have shown that cysteine oxidation of sarcomere proteins can impact the function of the  
83 contractile unit. One example is based on the opposing effects of glutathionylation and  
84 nitrosylation on Cys 134 of fast-twitch troponin I, which modulates its affinity for  $\text{Ca}^{2+}$  and  
85 subsequent force generation (Dutka et al., 2017). The large protein titin is also subject to  
86 oxidative modifications that modulate its mechanical properties such as elasticity and stiffness  
87 (Giganti, Yan, Badilla, Fernandez, & Alegre-Cebollada, 2018). To test our hypothesis, we  
88 applied a novel redox proteomics approach to quantitatively profile the levels of oxidation on  
89 protein cysteines in muscle tissue of older adults to identify signatures that may distinguish  
90 among varying degrees of physical performance.

91

## 92 **2. Results**

### 93 **2.1 Study cohort**

94 The Study of Muscle, Mobility and Aging (SOMMA) was conceived to investigate how  
95 biological changes in muscle contribute to the decline in mobility – strength and walking – with  
96 aging. SOMMA recruited participants aged 70 years or older for extensive tests of physical  
97 performance (phenotypes) and collection of biospecimens (Cummings et al., 2023)(**Fig. 1**).  
98 Needle biopsies from vastus lateralis muscle were collected for a variety of analyses, such as  
99 gene expression, mitochondrial respirometry (Mau et al., 2023), and protein cysteine oxidation  
100 (this study). Participants in this exploratory study selected from the larger SOMMA cohort are  
101 representative of both sexes, age range, and range of phenotypes measured at the clinical sites.  
102 Participant characteristics of this study are summarized in **Table 1**, which were used for testing  
103 relationships between site-specific cysteine oxidation and phenotype data related to mobility.

## 104 **2.2 Muscle redox proteome profiling**

105 To test the hypothesis that protein Cys thiol oxidation on specific Cys residues of muscle  
106 proteins are associated with reduced muscle function and physical performance, we  
107 quantitatively profiled the redox proteome of muscle tissue from older adults. For reference, we  
108 define the term “cysteine oxidation” as the total oxidation level of all reversible forms of PTMs  
109 on a given Cys residue, which serves as an overall measure of the redox state for a given Cys site  
110 (Zhang, Gaffrey, Li, & Qian, 2021). Since the levels of oxidation on protein Cys residues are  
111 impacted by factors such as protein abundance, we devised a peptide-level enrichment strategy  
112 that is adapted from our previously reported deep redox profiling workflow (Day et al., 2022).  
113 This workflow measures both global protein abundance and cysteine oxidation (**Fig. 1;**  
114 **Supplemental Fig. S1A**). To conduct an initial comparison of cysteine oxidation and protein  
115 abundance, we performed the first experiment using only 14 tissue samples. Statistical analysis  
116 using linear regression models adjusted for sex, age, and weight (see methods) was applied to  
117 test associations between protein Cys oxidation and muscle function (leg power and strength),  
118 walking speed, and fitness (VO<sub>2</sub> peak). The results revealed a greater number of significant  
119 associations ( $p < 0.05$ ) for Cys oxidation (122 Cys sites) than protein abundance (15 proteins)  
120 (data not shown). These initial experiment results confirm that redox proteome profiling of Cys  
121 oxidation provides more informative measurements for testing associations with muscle function  
122 than protein abundance. Thus, we focus on quantitative profiling of protein Cys oxidation in  
123 muscle tissues from 56 SOMMA participants (**Table 1**).

124 We used a tandem mass tag (TMT) multiplexed quantification strategy (**Supplemental**  
125 **Fig. S1B**), to allow for multiplexed quantification of Cys oxidation across 14 samples in each  
126 multiplex experiment. In total, we measured oxidation of 15,049 Cys sites, covering 4,354

127 proteins. Using this dataset, we applied a 75% completeness threshold to analyze Cys sites with  
128 higher coverage of oxidation data across all plexes, yielding 7,721 Cys sites from 2,657 proteins.  
129 Principal component analysis (PCA) highlights the variation in protein oxidation profiles among  
130 participants, where most are dispersed throughout the plot with minimal separation due to  
131 variables such as sex (**Supplemental Fig. S2**).

### 132 **2.3 Statistical association analysis of Cys oxidation on key muscle proteins**

133 To test our hypothesis, we prioritized the analysis of a select group of 22 muscle  
134 structural and contractile proteins that are key components of sarcomeres to determine the  
135 association of Cys oxidation on these proteins with four measurements of physical performance  
136 (**Fig. 1; Supplemental File S1**). Linear regression LIMMA models (Smyth, 2005) using sex,  
137 age, and weight as covariates were used to test associations, where the significance threshold was  
138 set at a p value  $< 0.05$  (**Supplemental File S2**). For each functional measurement, the levels of  
139 oxidation at significantly associated Cys sites ( $p < 0.05$ ) were plotted as heatmaps, which  
140 revealed clusters of Cys sites with similar oxidation profiles (e.g., **Supplemental Fig. S3**). We  
141 further define each of the clusters as a “signature” of Cys sites. The statistical significance of  
142 each signature (or cluster of Cys sites) in association with a given functional measure was further  
143 tested by LIMMA, where all signatures were statistically significant (adjusted  $p < 0.05$ )  
144 (**Supplemental File S3**).

### 145 **2.4 Signatures of Cys oxidation associated with functional measures**

146 We first examined the signatures of Cys sites that show statistically significant  
147 associations with  $VO_2$  peak, which is considered the gold standard measure of cardiorespiratory  
148 fitness. A heatmap of all 19 Cys sites that passed our statistical significance cutoff ( $p$  value  $<$



149 0.05) revealed that oxidation levels on specific Cys sites of nebulin (NEBU), obscurin (OBSCN),  
150 and myomesin-2 (MYOM2) were associated with cardiopulmonary fitness (**Supplemental Fig.**  
151 **S3**). Pearson correlation was used to further test the significance of the signatures with a given  
152 phenotype. The correlation plots of each cluster are shown in **Supplemental Fig. S4**, where  
153 clusters 2 and 4 showed a significant negative association ( $R < -0.30$ ;  $p < 0.05$ ). Among the  
154 clusters, one of the NEBU signatures that consisted of 5 Cys sites showed a predominantly  
155 negative association with  $VO_2$  peak (**Fig. 2A and Fig. 3A**), suggesting the oxidation levels on  
156 specific Cys sites of NEBU are functionally related to overall cardiopulmonary fitness.

157 Time to complete a 400-meter walk is a key metric of mobility in older adults, thus we  
158 next tested associations between protein Cys oxidation and average walking speed. As shown in  
159 the overall heatmap (**Supplemental Fig. S5**), a total of 35 Cys sites were associated with  
160 walking speed, which include 14 out of the 22 proteins being tested (**Supplemental File S1**).  
161 Correlation analysis (**Supplemental Fig. S6**) indicated that all clusters except cluster 5 displayed  
162 significant, negative associations with walking speed ( $R < -0.30$ ;  $p < 0.05$ ). **Fig. 2B** shows a  
163 signature of 12 Cys sites (i.e., cluster 2 of **Supplemental Fig. S5**) corresponding to myomesin-1  
164 (MYOM1), alpha-actinin-2 (ACTN2), MYOM2, NEBU, and OBSCN that were significantly  
165 associated with walking speed. The negative correlation ( $R = -0.39$ ,  $p = 0.028$ ; **Fig. 3B**)  
166 suggested that there is a negative association between Cys oxidation of these proteins and  
167 walking speed.

168 We next studied the association between leg strength, leg power, and Cys oxidation. As  
169 shown in the heatmap (**Supplemental Fig. S7**), a total of 41 Cys sites from 15 proteins displayed  
170 different levels of association with leg strength. Correlation analysis of each cluster  
171 (**Supplemental Fig. S8**) revealed that only clusters 5 and 6 had significant negative associations

172 ( $R < -0.30$ ;  $p < 0.05$ ). **Fig. 2C and 3C** highlights the signature of Cys sites (cluster 6 from  
173 **Supplemental Fig. S7**;  $R = -0.33$ ,  $p = 0.014$ ) from several proteins such as the alpha isoform of  
174 skeletal muscle actin (ACTS), myosin-7 (MYH7: slow myosin heavy chain), tropomyosin beta  
175 chain (TPM2), ACTN2, OBSCN, NEBU, and MYOM2. Furthermore, **Supplemental Fig. S9**  
176 shows 33 Cys sites from 11 proteins that were significantly associated with leg power. Clusters 2  
177 and 5 (**Supplemental Fig. S10**) had either a significant negative or positive correlation with peak  
178 leg power ( $R < -0.30$  or  $R > 0.45$ ;  $p < 0.05$ ). **Fig. 2D and 3D** shows a cluster containing 7 Cys  
179 sites (cluster 2 of **Supplemental Fig. S9**) corresponding to ACTS, ACTN2, and MYOM2 with a  
180 negative association ( $R = -0.34$ ;  $p = 0.012$ ) between leg power and Cys oxidation.

181 In agreement with our general hypothesis, most of the clusters exhibited a negative  
182 association between Cys oxidation and all functional measures. However, we observed a  
183 surprisingly different signature for alpha-actinin-3 (ACTN3), which shows a significant positive  
184 correlation ( $R = 0.48$ ,  $p = 0.00021$ ; **Fig. 4A-B**). This specific signature contains 8 Cys sites that  
185 are exclusive to ACTN3, suggesting potential functional regulation of this protein involved in leg  
186 power. Interestingly, ACTN2 is a homolog of ACTN3 with roughly 80% identity but does not  
187 show a similar relationship between oxidation and leg power (**Fig. 2D**). From a structural  
188 standpoint, these sites were mapped to the predicted structure of ACTN3, where we identified 2  
189 pairs of Cys sites within the spectrin repeat region that are potentially in close enough proximity  
190 to form structural disulfides (**Fig. 4C**, Cys 490;494 and Cys 593;601). Cys194 is found within  
191 the actin binding domain, while Cys788 and 869 are each found within a pair of EF hands that  
192 make up the Calmodulin-like domain (**Fig. 4C**), suggesting that redox regulation of Cys residues  
193 is a potential mechanism for modulating multiple functional regions of ACTN3.

194

### 195 **3. Discussion**

196 Our current study not only provides a first-time view into the molecular landscape of  
197 protein Cys oxidation in aging human muscle tissues, but also demonstrates that levels of Cys  
198 oxidation on key muscle sarcomeric proteins are generally negatively associated with poorer  
199 physical performance. In doing so, the data supports the hypothesis that Cys oxidation signatures  
200 are associated with muscle and physical performance. Linear regression and correlation analyses  
201 led to identification of signatures with Cys sites whose oxidation levels are significantly  
202 associated with muscle function (leg strength and power), physical performance (walking speed),  
203 and fitness (VO<sub>2</sub> peak). These signatures contain several proteins that contribute to sarcomere  
204 structure as well as contractile activity such as NEBU, OBSCN, ACTS, MYH7, ACTN2, TPM2,  
205 MYOM1, and MYOM2.

206 For many decades, oxidative stress has been speculated to be a driver of muscle  
207 pathologies and aging, however this has not been previously tested in humans. Prior to this study,  
208 the relationship between Cys oxidation and aging has been tested in animal models (Campbell et  
209 al., 2019; Xiao et al., 2020), but not in humans. The findings presented in this study may begin to  
210 unravel the relationship between protein Cys oxidation and muscle function that is emerging as a  
211 regulatory mechanism in muscle biology. Given the importance of oxidative stress in the aging  
212 process, the application of redox proteomics has value for studying other domains in aging  
213 research to explore molecular mechanisms of aging and chronic aging-related diseases.

#### 214 **3.1 Implications of Cys oxidation on muscle proteins**

215 Among the structural and contractile proteins that were investigated, oxidation levels of  
216 Cys sites on several proteins repeatedly emerged as significantly associated with different

217 measures of muscle function, physical performance, and fitness, emphasizing their potential  
218 importance in aging muscle and mobility. One such case is nebulin, where it was found in  
219 multiple signatures that were significantly and negatively associated with all four phenotypic  
220 measurements (**Supplemental File S2**), along with its exclusive signature for VO<sub>2</sub> peak (**Fig.**  
221 **2A**). With a total of 6669 amino acids, nebulin is a giant protein that serves as an integral  
222 component of the skeletal muscle thin filament. It contributes to structure through regulation of  
223 thin filament length and plays a role in muscle contraction (Slick et al., 2023). Oxidation of Cys  
224 sites on this protein may disrupt these essential interactions and dysregulate the organization of  
225 actomyosin filaments.

226         One of the most striking observations in this study revolves around the association of  
227 ACTN3 Cys oxidation and leg peak power (**Fig. 4A-B**). Cys868 of ACTN3 has been identified  
228 in an aging mouse study as redox-sensitive (McDonagh, Sakellariou, Smith, Brownridge, &  
229 Jackson, 2014), which is orthologous to human Cys 869 (**Fig. 4A**), supporting the notion that this  
230 protein function could be subjected to redox regulation. Contrary to our hypothesis and the  
231 notion that higher Cys oxidation results in a decline of muscle performance, the oxidation levels  
232 on multiple Cys sites of ACTN3 are positively correlated with peak leg power ( $R = 0.48$ ). The  
233 gene encoding  $\alpha$ -actinin-3, regarded as the “gene of speed”, is associated with speed and power  
234 in athletes, and is exclusively expressed in type-II fast twitch muscle fibers, while ACTN2 is  
235 expressed in all skeletal muscle fibers (Pickering & Kiely, 2017). Oxidation in the different  
236 functional domains of ACTN3 may serve important roles in regulating its function in type-II  
237 fibers responsible for generating maximum muscular power.

238         In the sarcomere, alpha-actinin proteins bind and crosslink overlapping F-actin filaments  
239 at the Z line, making them important proteins for muscle integrity and quality (Burgoyne,

240 Morris, & Luther, 2015). The actinin proteins also serve an important role in the conformational  
241 changes of the Z-disc lattice during contraction to propagate force transmission across  
242 sarcomeres (Oda & Yanagisawa, 2020). Specifically, the calponin-homology domains of alpha-  
243 actinin are important for conformational changes of the protein, where oxidation of Cys194 was  
244 observed (Haywood et al., 2016) (actin binding region; **Fig. 4C**). Further, alpha-actinin interacts  
245 with titin through its EF-hand domains, where we saw oxidation of Cys788 and Cys869 (Young  
246 & Gautel, 2000) (calmodulin-like domain; **Fig. 4C**). Disruption to this interaction has effects on  
247 myofilament lattice spacing with subsequent changes in cross-bridge kinetics (Rodriguez Garcia  
248 et al., 2023). The difference in oxidation levels at Cys869 within the EF-hand 2 domain of  
249 ACTN2 and ACTN3 may partially explain the differences in the negative and positive  
250 correlations between power measures and oxidation levels of ACTN2 and ACTN3.

251 A number of factors could drive the highly contrasting alpha actinin 2 and 3 oxidation  
252 profiles, such as the ACTN3 genotype, where the distribution of individuals homozygous for a  
253 premature stop codon R577X polymorphism is estimated to be 20% (North et al., 1999). With  
254 this frequency, it is possible that some subjects in this study may have limited expression of  
255 ACTN3, which would affect the levels of protein Cys oxidation detected in our assay. The  
256 ACTN3 genotype may also influence muscle type I slow twitch/ type II fast twitch fiber  
257 distribution (Vincent et al., 2007), adding to the list of factors that may explain our results. The  
258 exclusive expression of ACTN3 in type II fast twitch muscle fibers also suggests fiber-type  
259 specific physiological functions, which have differing responses to oxidants (Anderson &  
260 Neuffer, 2006) and could play a part in the ACTN3 oxidation profile observed in this study.  
261 Subsequent studies on the role of redox-based PTMs on ACTN3 are warranted to gain a better  
262 understanding of its functional regulation.

263 Besides signatures exclusive to single proteins, we also observed instances of oxidized  
264 Cys sites on proteins like TNNI2 and ACTS that have been previously reported in the literature.  
265 Our assay identified oxidation at Cys134 of fast skeletal muscle troponin I (TNNI2) as  
266 significantly associated with other clusters in the walking speed and leg power analyses  
267 (**Supplemental File S2; Supplemental Fig. S5, S7**). Previous structural analysis work identified  
268 this Cys site as solvent-accessible, suggesting it is oxidant-accessible (Gross & Lehman, 2013).  
269 Other work revealed that the site undergoes S-Glutathionylation and S-Nitrosylation oxidative  
270 modifications (Dutka et al., 2017) that modulate Ca<sup>2+</sup> sensitivity and force generation,  
271 emphasizing this as a redox-sensitive site. Another protein is skeletal muscle alpha actin, which  
272 is one of the basic components of the thin filaments in muscle but is also susceptible to Cys  
273 oxidation. We identified Cys219 on ACTS as significantly associated with leg strength (**Fig.**  
274 **2C**), while Cys 287 was significantly associated with both leg strength and leg power (**Fig. 2C-**  
275 **D**). These sites have been identified as redox-sensitive Cys residues in prior work comparing  
276 adult and aged mouse skeletal muscle (McDonagh et al., 2014). Oxidation of actin can disrupt  
277 interactions with myosin, resulting in attenuated contraction and force production (Elkrief,  
278 Cheng, Matusovsky, & Rassier, 2022).

### 279 **3.2 Limitations of this study**

280 This study has several limitations to be acknowledged. While this study focused on  
281 measurements of Cys oxidation, global protein abundance profiling could provide additional  
282 insight into the biology of impaired muscle performance. Deep profiling of global protein  
283 abundances provides more resolution on other aspects, such gene expression or protein  
284 degradation, which can help to interpret observations beyond the level of PTMs. With 56  
285 community-based volunteers, the study has limited statistical power to test associations and other

286 confounding factors such as race, metabolism, and lifestyle, which may influence the  
287 heterogenous patterns of Cys oxidation. For example, we and others have previously  
288 demonstrated increased Cys oxidation in skeletal muscle after fatiguing contractions, suggesting  
289 significant physical activity in the day or hours prior to the biopsy could be confounding  
290 (Kramer et al., 2018; Pugh et al., 2021). The SOMMA population is predominantly non-Hispanic  
291 White, and given our sample size, we have limited ability to test whether associations between  
292 signatures of Cys thiol oxidation and our functional outcomes vary by race or ethnicity.  
293 Additional factors related to the qualities of muscle, such as fiber type distribution, capillary  
294 density, or systemic inflammation can also influence the results. The cross-sectional design  
295 allows for testing the concurrent effects of muscle protein oxidation on muscle and physical  
296 performance, however repeated assessments are needed to test how Cys oxidation predicts  
297 change in performance with aging. Measurements of antioxidant capacity are also warranted, as  
298 the levels of antioxidant enzymes (e.g. mitochondrial superoxide dismutase, glutathione  
299 peroxidase, catalase) can vary among individuals (Picard, Ritchie, Thomas, Wright, & Hepple,  
300 2011) and may help to interpret our findings. Nonetheless, this first study in older adults has  
301 several strengths. It has the power to detect significant associations of muscle protein oxidation  
302 with important components of mobility. The state-of-the-art assays included an array of proteins  
303 known to play important roles in muscle functions and identified several pronounced signatures  
304 of Cys thiol oxidation that associate well with the measures of muscle function, physical  
305 performance, and fitness investigated in this study.

306 In summary, this study supports the hypothesis that higher levels of Cys oxidation on key  
307 muscle proteins are largely negatively associated with several measures of muscle function,  
308 physical performance, and fitness. These findings should be further tested in a more expanded

309 study or a longitudinal study and investigated in physiological studies to understand the complex  
310 impact of cysteine oxidation on muscle and physical function.

311

## 312 **4. Materials and Methods**

### 313 **4.1 Participants and cohort design**

314 The Study of Muscle, Mobility and Aging (SOMMA;  
315 <https://www.sommaonline.ucsf.edu>) is a cohort study of 879 men and women aged 70 or older  
316 who were recruited at University of Pittsburgh and Wake Forest University School of Medicine.  
317 A description of the design and methods of SOMMA has been published (Cummings et al.  
318 2023). Participants were eligible for this study if they were willing and able to complete a muscle  
319 tissue biopsy and magnetic resonance spectroscopy (MRS). All participants provided written and  
320 informed consent and the Western IRB-Copernicus Group (WCG) Institutional Review Board  
321 approved the SOMMA (WCGIRB #20180764). For this exploratory redox proteomics profiling  
322 study, 56 participants were selected partially based on tissue sample availability and to ensure 1)  
323 equal distribution across the cohort age range and 2) equal numbers of men and women  
324 participants (**Table 1**).

### 325 **4.2 Collection of clinical parameters and phenotype data**

326 SOMMA baseline assessments were completed over the course of several days  
327 (Cummings et al., 2023). Age, race, and sex were assessed by questionnaire. Body weight was  
328 measured on a balance beam or digital scales. To determine usual walking speed, participants  
329 were instructed to walk 10 complete laps around a 40-meter course at their usual pace and  
330 without overexerting themselves nor any assistive device other than a straight cane. The total  
331 time in seconds to walk 400 meters includes the rest time if the participant stopped walking



332 during the test and was used to calculate walking speed in m/sec. Leg extension strength was  
333 assessed by a one repetition max (1RM) on a Keiser Air 420 exercise machine, and peak power  
334 was measured across the 40-70% range of leg extension.

335 Cardiorespiratory fitness was assessed by a cardiopulmonary exercise test (CPET).  
336 Participants walked for 5 minutes at a preferred walking speed, and progressive symptom-limited  
337 exercise protocol ensued with increases in speed (0.5 mph) and incline (2.5%) in 2-minute  
338 increments using a modified Balke protocol or a manual protocol. Cardiorespiratory fitness was  
339 determined as  $\text{VO}_2$  peak (mL/min), which was identified as the highest 30-second average of  
340  $\text{VO}_2$  (mL/min) achieved.

#### 341 **4.3 Muscle biopsy sample collection**

342 Percutaneous biopsies were collected from the middle region of the musculus vastus  
343 lateralis under local anesthesia using a Bergstrom canula with suction (Evans, Phinney, &  
344 Young, 1982). Following this, the specimen was blotted dry of blood and interstitial fluid and  
345 dissected free of any connective tissue and intermuscular fat. Samples were flash frozen in liquid  
346 nitrogen (LN) and stored in the vapor phase of LN. Samples were shipped to PNNL on dry ice  
347 for proteomics analysis.

#### 348 **4.4 Redox proteomics and mass spectrometry**

349 Muscle biopsy samples (20-30mg) were processed as previously described (Day et al.,  
350 2022). 2 additional samples were generated by pooling tissue from the other samples to quantify  
351 both oxidized and reduced protein thiols (“total thiol”, **Supplemental Fig. 1A**). After acetone  
352 precipitation, the proteins were resuspended in a 200mM Tris (pH 8); 8M Urea buffer, reduced  
353 with DTT, and digested overnight with sequence-grade trypsin (Promega) at a 1:50 ( $\mu\text{g}$  trypsin:  
354  $\mu\text{g}$  protein) ratio. The peptides were cleaned up by C-18 SPE and 100  $\mu\text{g}$  of peptide from each

355 sample was labeled with TMT18plex reagents (ThermoFisher; **Supplemental Fig. 1B**). 133C  
356 and 134N were not used for quantification of total oxidation due to potential interference from  
357 the 134C and 135N tags used to quantify total thiol. The labeled peptides were then resuspended  
358 in 250mM HEPES pH 8, reduced with DTT at a final concentration of 5mM, and a 100 $\mu$ g  
359 aliquot of peptide was collected for global proteomics. The remaining peptide was diluted 6-fold  
360 with 25mM HEPES pH 7.7 to obtain a DTT concentration of  $\sim$ 0.8mM to permit enrichment of  
361 Cys-containing peptides with thiol affinity resin. The enrichment procedure is adapted from our  
362 RAC-TMT workflow (Guo et al., 2014). After enrichment, the enriched redox peptides and  
363 global peptides were alkylated with iodoacetamide at 4 times the molarity of the DTT present in  
364 the samples and desalted using C-18 SPE.

365 20 $\mu$ g of enriched redox peptides were collected into 12 concatenated fractions as  
366 previously described (Day et al., 2022). Instrument runs were grouped by fraction order within  
367 each plex and arranged using a block design strategy (i.e., block 1 = fraction 1 from each plex) to  
368 avoid introduction of confounding factors due to decay of instrument performance. Conditions  
369 and parameters for LC-MS/MS runs are described elsewhere (Day et al., 2023). Samples of  
370 global peptide from each plex were prepared at a concentration of 0.1 $\mu$ g/ $\mu$ L and used for single  
371 injections that were run on the same instrument as enriched redox peptides.

#### 372 **4.5 MS/MS Data processing and statistical analysis**

373 Raw data were searched against a database containing the Uniprot *Homo sapiens*  
374 proteome (release 2023\_1 with 20, 407 entries) and common contaminants using MS-GF+ with  
375 search parameters specified elsewhere (Day et al., 2022). TMT reporter ion intensities were  
376 extracted by MASIC as described in (Day et al., 2022). Data from all fractions of redox  
377 multiplexes were aggregated together to the site-centric level and summarized using the R tool

378 “PlexedPiper” (<https://github.com/PNNL-Comp-Mass-Spec/PlexedPiper>). Additional processing  
379 steps are as follows. The redox data was corrected for changes in protein abundance by taking  
380 the median intensities of un-normalized global peptide-centric data and scaling them to the  
381 average median intensity of the redox data, which was then used to center corresponding  
382 channels in the redox data. Data were corrected for multiplex-to-multiplex batch effects as well  
383 as biopsy collection site using the “ComBat” function in the R package “sva” (Leek, Johnson,  
384 Parker, Jaffe, & Storey, 2012) (<https://bioconductor.org/packages/release/bioc/html/sva.html>).  
385 75% completeness filtering was set as an additional criterion prior to median centering of Cys  
386 site expression and the data was filtered for Cys sites corresponding to a select group of proteins  
387 related to muscle protein structure and contraction (**Supplemental File S1**) for prioritized  
388 analysis.

389 Statistical analysis was performed using linear regression modeling with the “limma” R  
390 package for its enhanced statistical power with low sample size (Smyth, 2005)  
391 (<https://bioconductor.org/packages/release/bioc/html/limma.html>). The models were not  
392 stratified by sex due to the limited number of samples and were adjusted for sex, age, and weight  
393 of the participants as covariates to test against the phenotypes of leg power, leg strength, walking  
394 speed, and cardiopulmonary fitness. Cys sites with statistically significant associations were  
395 defined by a p value < 0.05 threshold. For each phenotype, significantly associated Cys sites  
396 were plotted on heatmaps if they had 100% completeness across all samples and Cys oxidation  
397 levels for patients without phenotype data were excluded from heatmaps. Heatmap phenotypes  
398 were converted to Z-score and samples correspondingly arranged prior to row clustering.  
399 Heatmaps were segregated into 6 distinct clusters defined by the hierarchical clustering  
400 dendrogram. Cluster centroids were defined by averaging feature intensities for each sample

401 within a cluster. Cluster centroids were then plotted against non-Z-scored phenotype to produce  
402 cluster correlation plots scored by Pearson correlation. Cluster-to-phenotype correlation was  
403 further evaluated by limma using cluster centroids as a combined feature (**Supplemental File**  
404 **S3**).

405

#### 406 **4.6 Data availability**

407 The mass spectrometry data have been deposited to the MassIVE repository with the  
408 dataset accession: MSV000093136. SOMMA data are also available at  
409 <https://sommaonline.ucsf.edu/>.

410

#### 411 **Acknowledgements**

412 Mass spectrometry proteomics experiments were performed in the Environmental Molecular  
413 Sciences Laboratory, Pacific Northwest National Laboratory, a national scientific user facility  
414 sponsored by the DOE under Contract DE-AC05-76RL0 1830.

#### 415 **Author Disclosure**

416 S.R.C. and P.M.Ca. are consultants to Bioage Labs. All other authors declare no conflict of  
417 interest.

#### 418 **Funding Statement**

419 The Study of Muscle, Mobility and Aging (SOMMA) is supported by funding from the National  
420 Institute on Aging, grant number AG059416. Study infrastructure support was funded in part by  
421 NIA Claude D. Pepper Older American Independence Centers at University of Pittsburgh  
422 (P30AG024827) and Wake Forest University (P30AG021332) and the Clinical and Translational  
423 Science Institutes, funded by the National Center for Advancing Translational Science, at Wake

424 Forest University (UL1 0TR001420). Additional support for this study provided by the

425 Longevity Consortium (U19AG023122).

426

427 **References**

- 428 Anderson, E. J., & Neuffer, P. D. (2006). Type II skeletal myofibers possess unique properties  
429 that potentiate mitochondrial H<sub>2</sub>O<sub>2</sub> generation. *American Journal of Physiology-Cell*  
430 *Physiology*, 290(3), C844-C851. doi:10.1152/ajpcell.00402.2005
- 431 Andrade, F. H., Reid, M. B., Allen, D. G., & Westerblad, H. (1998). Effect of hydrogen peroxide  
432 and dithiothreitol on contractile function of single skeletal muscle fibres from the mouse.  
433 *J Physiol*, 509 ( Pt 2)(Pt 2), 565-575. doi:10.1111/j.1469-7793.1998.565bn.x
- 434 Bouviere, J., Fortunato, R. S., Dupuy, C., Werneck-de-Castro, J. P., Carvalho, D. P., & Louzada,  
435 R. A. (2021). Exercise-Stimulated ROS Sensitive Signaling Pathways in Skeletal Muscle.  
436 *Antioxidants*, 10(4), 537.
- 437 Brandes, N., Schmitt, S., & Jakob, U. (2009). Thiol-based redox switches in eukaryotic proteins.  
438 *Antioxidants & Redox Signaling*, 11(5), 997-1014. doi:10.1089/ars.2008.2285
- 439 Burgoyne, T., Morris, E. P., & Luther, P. K. (2015). Three-Dimensional Structure of Vertebrate  
440 Muscle Z-Band: The Small-Square Lattice Z-Band in Rat Cardiac Muscle. *J Mol Biol*,  
441 427(22), 3527-3537. doi:10.1016/j.jmb.2015.08.018
- 442 Campbell, M. D., Duan, J., Samuelson, A. T., Gaffrey, M. J., Merrihew, G. E., Egertson, J. D., . . .  
443 . Marcinek, D. J. (2019). Improving mitochondrial function with SS-31 reverses age-  
444 related redox stress and improves exercise tolerance in aged mice. *Free Radic Biol Med*,  
445 134, 268-281. doi:10.1016/j.freeradbiomed.2018.12.031
- 446 Cummings, Steven R., Newman, Anne B., Coen, Paul M., Hepple, Russell T., Collins, R.,  
447 Kennedy, K., . . . Cawthon, Peggy M. (2023). The Study of Muscle, Mobility and Aging  
448 (SOMMA): A Unique Cohort Study About the Cellular Biology of Aging and Age-  
449 related Loss of Mobility. *The Journals of Gerontology: Series A*, glad052.  
450 doi:10.1093/gerona/glad052
- 451 Day, N. J., Wang, J., Johnston, C. J., Kim, S.-Y., Olson, H. M., House, E. L., . . . McGraw, M. D.  
452 (2023). Rat bronchoalveolar lavage proteome changes following e-cigarette aerosol  
453 exposures. *American Journal of Physiology-Lung Cellular and Molecular Physiology*,  
454 324(5), L571-L583. doi:10.1152/ajplung.00016.2023
- 455 Day, N. J., Zhang, T., Gaffrey, M. J., Zhao, R., Fillmore, T. L., Moore, R. J., . . . Qian, W.-J.  
456 (2022). A deep redox proteome profiling workflow and its application to skeletal muscle  
457 of a Duchenne Muscular Dystrophy model. *Free Radical Biology and Medicine*, 193,  
458 373-384. doi:https://doi.org/10.1016/j.freeradbiomed.2022.10.300
- 459 de Vries, N. M., van Ravensberg, C. D., Hobbelen, J. S. M., Olde Rikkert, M. G. M., Staal, J. B.,  
460 & Nijhuis-van der Sanden, M. W. G. (2012). Effects of physical exercise therapy on  
461 mobility, physical functioning, physical activity and quality of life in community-  
462 dwelling older adults with impaired mobility, physical disability and/or multi-morbidity:  
463 A meta-analysis. *Ageing Research Reviews*, 11(1), 136-149.  
464 doi:https://doi.org/10.1016/j.arr.2011.11.002
- 465 Dutka, T. L., Mollica, J. P., Lambole, C. R., Weerakkody, V. C., Greening, D. W., Posterino, G.  
466 S., . . . Lamb, G. D. (2017). S-nitrosylation and S-glutathionylation of Cys134 on  
467 troponin I have opposing competitive actions on Ca<sup>2+</sup> sensitivity in rat fast-twitch  
468 muscle fibers. *American Journal of Physiology-Cell Physiology*, 312(3), C316-C327.  
469 doi:10.1152/ajpcell.00334.2016

- 470 Elkrief, D., Cheng, Y.-S., Matusovsky, O. S., & Rassier, D. E. (2022). Oxidation alters myosin-  
471 actin interaction and force generation in skeletal muscle filaments. *American Journal of*  
472 *Physiology-Cell Physiology*, 323(4), C1206-C1214. doi:10.1152/ajpcell.00427.2021
- 473 Evans, W. J., Phinney, S. D., & Young, V. R. (1982). Suction applied to a muscle biopsy  
474 maximizes sample size. *Medicine & Science in Sports & Exercise*, 14(1).
- 475 Giganti, D., Yan, K., Badilla, C. L., Fernandez, J. M., & Alegre-Cebollada, J. (2018). Disulfide  
476 isomerization reactions in titin immunoglobulin domains enable a mode of protein  
477 elasticity. *Nature Communications*, 9(1), 185. doi:10.1038/s41467-017-02528-7
- 478 Gladyshev, V. N. (2014). The free radical theory of aging is dead. Long live the damage theory!  
479 *Antioxid Redox Signal*, 20(4), 727-731. doi:10.1089/ars.2013.5228
- 480 Gross, S. M., & Lehman, S. L. (2013). Accessibility of Myofibrillar Cysteines and Effects on  
481 ATPase Depend on the Activation State during Exposure to Oxidants. *PLOS ONE*, 8(7),  
482 e69110. doi:10.1371/journal.pone.0069110
- 483 Guo, J., Gaffrey, M. J., Su, D., Liu, T., Camp, D. G., 2nd, Smith, R. D., & Qian, W. J. (2014).  
484 Resin-assisted enrichment of thiols as a general strategy for proteomic profiling of  
485 cysteine-based reversible modifications. *Nat Protoc*, 9(1), 64-75.  
486 doi:10.1038/nprot.2013.161
- 487 Haywood, N. J., Wolny, M., Rogers, B., Trinh, C. H., Shuping, Y., Edwards, T. A., & Peckham,  
488 M. (2016). Hypertrophic cardiomyopathy mutations in the calponin-homology domain of  
489 ACTN2 affect actin binding and cardiomyocyte Z-disc incorporation. *The Biochemical*  
490 *journal*, 473(16), 2485-2493. doi:10.1042/bcj20160421
- 491 Henríquez-Olguin, C., Knudsen, J. R., Raun, S. H., Li, Z., Dalbram, E., Treebak, J. T., . . .  
492 Jensen, T. E. (2019). Cytosolic ROS production by NADPH oxidase 2 regulates muscle  
493 glucose uptake during exercise. *Nature Communications*, 10(1), 4623.  
494 doi:10.1038/s41467-019-12523-9
- 495 Kehm, R., Baldensperger, T., Raupbach, J., & Höhn, A. (2021). Protein oxidation - Formation  
496 mechanisms, detection and relevance as biomarkers in human diseases. *Redox Biology*,  
497 42, 101901. doi:https://doi.org/10.1016/j.redox.2021.101901
- 498 Kramer, P. A., Duan, J., Gaffrey, M. J., Shukla, A. K., Wang, L., Bammler, T. K., . . . Marcinek,  
499 D. J. (2018). Fatiguing contractions increase protein S-glutathionylation occupancy in  
500 mouse skeletal muscle. *Redox Biol*, 17, 367-376. doi:10.1016/j.redox.2018.05.011
- 501 Kramer, P. A., Duan, J., Qian, W. J., & Marcinek, D. J. (2015). The Measurement of Reversible  
502 Redox Dependent Post-translational Modifications and Their Regulation of  
503 Mitochondrial and Skeletal Muscle Function. *Front Physiol*, 6, 347.  
504 doi:10.3389/fphys.2015.00347
- 505 Leek, J. T., Johnson, W. E., Parker, H. S., Jaffe, A. E., & Storey, J. D. (2012). The sva package  
506 for removing batch effects and other unwanted variation in high-throughput experiments.  
507 *Bioinformatics*, 28(6), 882-883. doi:10.1093/bioinformatics/bts034
- 508 Lehman, S. J., Crocini, C., & Leinwand, L. A. (2022). Targeting the sarcomere in inherited  
509 cardiomyopathies. *Nat Rev Cardiol*, 19(6), 353-363. doi:10.1038/s41569-022-00682-0
- 510 López-Otín, C., Blasco, M. A., Partridge, L., Serrano, M., & Kroemer, G. (2023). Hallmarks of  
511 aging: An expanding universe. *Cell*, 186(2), 243-278.  
512 doi:https://doi.org/10.1016/j.cell.2022.11.001
- 513 Mau, T., Lui, L.-Y., Distefano, G., Kramer, P. A., Ramos, S. V., Toledo, F. G. S., . . . Coen, P.  
514 M. (2023). Mitochondrial Energetics in Skeletal Muscle Are Associated With Leg Power

- 515 and Cardiorespiratory Fitness in the Study of Muscle, Mobility and Aging. *The Journals*  
516 *of Gerontology: Series A*, 78(8), 1367-1375. doi:10.1093/gerona/glac238
- 517 McDonagh, B., Sakellariou, G. K., Smith, N. T., Brownridge, P., & Jackson, M. J. (2014).  
518 Differential Cysteine Labeling and Global Label-Free Proteomics Reveals an Altered  
519 Metabolic State in Skeletal Muscle Aging. *Journal of Proteome Research*, 13(11), 5008-  
520 5021. doi:10.1021/pr5006394
- 521 Musci, R. V., Hamilton, K. L., & Linden, M. A. (2019). Exercise-Induced Mitohormesis for the  
522 Maintenance of Skeletal Muscle and Healthspan Extension. *Sports*, 7(7), 170.
- 523 North, K. N., Yang, N., Wattanasirichaigoon, D., Mills, M., Eastal, S., & Beggs, A. H. (1999).  
524 A common nonsense mutation results in  $\alpha$ -actinin-3 deficiency in the general population.  
525 *Nature Genetics*, 21(4), 353-354. doi:10.1038/7675
- 526 Oda, T., & Yanagisawa, H. (2020). Cryo-electron tomography of cardiac myofibrils reveals a 3D  
527 lattice spring within the Z-discs. *Commun Biol*, 3(1), 585. doi:10.1038/s42003-020-  
528 01321-5
- 529 Picard, M., Ritchie, D., Thomas, M. M., Wright, K. J., & Hepple, R. T. (2011). Alterations in  
530 intrinsic mitochondrial function with aging are fiber type-specific and do not explain  
531 differential atrophy between muscles. *Aging Cell*, 10(6), 1047-1055. doi:10.1111/j.1474-  
532 9726.2011.00745.x
- 533 Pickering, C., & Kiely, J. (2017). ACTN3: More than Just a Gene for Speed. *Frontiers in*  
534 *Physiology*, 8. doi:10.3389/fphys.2017.01080
- 535 Powers, S. K., Deminice, R., Ozdemir, M., Yoshihara, T., Bomkamp, M. P., & Hyatt, H. (2020).  
536 Exercise-induced oxidative stress: Friend or foe? *Journal of Sport and Health Science*,  
537 9(5), 415-425. doi:https://doi.org/10.1016/j.jshs.2020.04.001
- 538 Pugh, J. N., Stretton, C., McDonagh, B., Brownridge, P., McArdle, A., Jackson, M. J., & Close,  
539 G. L. (2021). Exercise stress leads to an acute loss of mitochondrial proteins and  
540 disruption of redox control in skeletal muscle of older subjects: An underlying decrease  
541 in resilience with aging? *Free Radical Biology and Medicine*, 177, 88-99.  
542 doi:https://doi.org/10.1016/j.freeradbiomed.2021.10.003
- 543 Rodriguez Garcia, M., Schmeckpeper, J., Landim-Vieira, M., Coscarella, I. L., Fang, X., Ma, W.,  
544 . . . Pinto, J. R. (2023). Disruption of Z-Disc Function Promotes Mechanical Dysfunction  
545 in Human Myocardium: Evidence for a Dual Myofilament Modulatory Role by Alpha-  
546 Actinin 2. *International Journal of Molecular Sciences*, 24(19), 14572.
- 547 Sies, H. (2020). Oxidative Stress: Concept and Some Practical Aspects. *Antioxidants*, 9(9), 852.
- 548 Slick, R. A., Tinklenberg, J. A., Sutton, J., Zhang, L., Meng, H., Beatka, M. J., . . . Lawlor, M.  
549 W. (2023). Aberrations in Energetic Metabolism and Stress-Related Pathways Contribute  
550 to Pathophysiology in the Neb Conditional Knockout Mouse Model of Nemaline  
551 Myopathy. *The American journal of pathology*, 193(10), 1528-1547.  
552 doi:https://doi.org/10.1016/j.ajpath.2023.06.009
- 553 Smyth, G. K. (2005). limma: Linear Models for Microarray Data. In R. Gentleman, V. J. Carey,  
554 W. Huber, R. A. Irizarry, & S. Dudoit (Eds.), *Bioinformatics and Computational Biology*  
555 *Solutions Using R and Bioconductor* (pp. 397-420). New York, NY: Springer New York.
- 556 Sohal, R. S., & Orr, W. C. (2012). The redox stress hypothesis of aging. *Free Radic Biol Med*,  
557 52(3), 539-555. doi:10.1016/j.freeradbiomed.2011.10.445
- 558 Vincent, B., Bock, K. D., Ramaekers, M., Eede, E. V. d., Leemputte, M. V., Hespel, P., &  
559 Thomis, M. A. (2007). ACTN3 (R577X) genotype is associated with fiber type



560 distribution. *Physiological Genomics*, 32(1), 58-63.  
561 doi:10.1152/physiolgenomics.00173.2007  
562 Wu, R., Dephoure, N., Haas, W., Huttlin, E. L., Zhai, B., Sowa, M. E., & Gygi, S. P. (2011).  
563 Correct Interpretation of Comprehensive Phosphorylation Dynamics Requires  
564 Normalization by Protein Expression Changes \*. *Molecular & Cellular Proteomics*,  
565 10(8). doi:10.1074/mcp.M111.009654  
566 Xiao, H., Jedrychowski, M. P., Schweppe, D. K., Huttlin, E. L., Yu, Q., Heppner, D. E., . . .  
567 Chouchani, E. T. (2020). A Quantitative Tissue-Specific Landscape of Protein Redox  
568 Regulation during Aging. *Cell*, 180(5), 968-983 e924. doi:10.1016/j.cell.2020.02.012  
569 Xirouchaki, C. E., Jia, Y., McGrath, M. J., Greatorex, S., Tran, M., Merry, T. L., . . . Tiganis, T.  
570 (2021). Skeletal muscle NOX4 is required for adaptive responses that prevent insulin  
571 resistance. *Science Advances*, 7(51), eabl4988. doi:doi:10.1126/sciadv.abl4988  
572 Young, P., & Gautel, M. (2000). The interaction of titin and alpha-actinin is controlled by a  
573 phospholipid-regulated intramolecular pseudoligand mechanism. *EMBO J*, 19(23), 6331-  
574 6340. doi:10.1093/emboj/19.23.6331  
575 Zhang, T., Gaffrey, M. J., Li, X., & Qian, W. J. (2021). Characterization of cellular oxidative  
576 stress response by stoichiometric redox proteomics. *Am J Physiol Cell Physiol*, 320(2),  
577 C182-c194. doi:10.1152/ajpcell.00040.2020

578

579 **Table 1:** Participant characteristics (n = 56)

| Characteristics                           | Group average     |
|-------------------------------------------|-------------------|
| Age, years                                | 77.6 ± 5.1        |
| Sex                                       | 28 Men + 28 Women |
| Weight, kg                                | 79.0 ± 18.8       |
| VO <sub>2</sub> peak, mL/min              | 1588.0 ± 498.1    |
| Walking Speed, m/s                        | 1.0 ± 0.2         |
| Leg Strength (One Repetition Maximum, kg) | 179.3 ± 67.2      |
| Peak leg power, Watts                     | 347.1 ± 185.8     |

584 All characteristics reported as mean ± SD

585

586

## 587 **Figure Legends**

588 **Figure 1.** Study design and workflow. Participants undergo baseline physical examinations (age,  
589 height, weight, blood pressure, etc.) and measures of muscle function (leg strength and power),  
590 walking speed, and fitness (VO<sub>2</sub> peak) as well as specimen collections (blood, urine, muscle,  
591 etc.) over multiple days (Cummings et al., 2023). Muscle biopsies were collected from vastus  
592 lateralis muscle. A deep redox proteomics profiling workflow was used to quantitatively measure  
593 Cys oxidation (i.e., all forms of reversible thiol PTMs). Analysis of redox proteomics data was

594 prioritized for a select group of muscle contraction proteins (Uniprot ID format) to test the  
595 hypothesis that protein Cys oxidation is associated with functional measures.

596

597 **Figure 2.** Selected signatures of Cys oxidation in significant association with fitness, muscle  
598 function, and physical performance. Cys sites on muscle proteins with oxidation levels  
599 significantly associated with a functional measure (**Supplemental File S2**) were clustered and  
600 plotted in heatmaps (**Supplemental Figures S3, S5, S7, S9**). A representative cluster of Cys sites  
601 (“signature”) from each phenotype-specific heatmap are shown in panels A-D. Each row  
602 represents a Cys site with oxidation levels that are significantly associated with a phenotype,  
603 while each column represents a participant. Columns are ranked in descending order from left to  
604 right based on phenotypic measurement and the phenotypic values are represented by median-  
605 centered Z-scores, while Cys oxidation levels were scaled by median-centering. Note that the  
606 row-wise hierarchical clustering of Cys sites is reordered from the original corresponding  
607 clusters in **Supplemental Figures S3, S5, S7, S9**. Protein identities are in UniProt format. Sites  
608 passing an adjusted p value < 0.05 cutoff are denoted by ‘\*’. A) Peak volume of oxygen  
609 consumption (VO<sub>2</sub> peak; mL/min) as a measure of cardiopulmonary fitness. B) Walking speed  
610 from a 400m walking test (m/s). C) Leg strength as measured by one repetition maximum (kg).  
611 D) Leg power measured as the highest peak power (watts) generated.

612

613 **Figure 3.** Selected signatures of Cys oxidation are negatively associated with fitness, muscle  
614 function, and physical performance in older adults. Signatures (sub-clusters) within each  
615 phenotype-specific heatmap (**Supplemental Figures S3, S5, S7, S9**) were plotted for correlation

616 analysis (**Supplemental Figures S4, S6, S8, S10**). Representative correlations of signatures of  
617 highlighted in **Fig. 2** are shown in panels A-D, where the mean level of oxidation across all Cys  
618 sites in a signature were plotted for each participant against their phenotypic measurement. *R* and  
619 *p* values are derived from Pearson correlation. A-D: Representative Pearson correlations for A)  
620 VO<sub>2</sub> peak, B) walking speed, C) leg strength, and D) leg power.

621

622 **Figure 4.** Unique, significant positive association between ACTN3 and leg power. A)  
623 Representative heatmap of ACTN3 signatures identified as significantly associated with the leg  
624 power phenotype. Each row represents a Cys site with oxidation levels that are significantly  
625 associated with a phenotype, while each column represents a participant. Columns are ranked in  
626 descending order from left to right based on phenotypic measurement and the phenotypic values  
627 are represented by median-centered Z-scores, while Cys oxidation levels were scaled by median-  
628 centering. Protein identities are in UniProt format. B) Cys sites from the ACTN3 signature in  
629 panel A were plotted for correlation analysis, where the mean level of oxidation across all Cys  
630 sites in a signature were plotted for each participant against their phenotypic measurement. *R* and  
631 *p* values are derived from Pearson correlation. C) AlphaFold-predicted structure of ACTN3 with  
632 all significantly associated Cys sites denoted by magenta colored text. The actin binding region  
633 (AA1-262), neck and spectrin repeat region (AA263-758), and calmodulin-like domain  
634 containing 2 pairs of EF hands (AA759-901) are colored in blue, gray, and green, respectively.

635

636 **Supplemental Figure S1.** Integrated global and redox proteomics workflow.

637 A) The RAC-TMT workflow (Guo et al., 2014) was modified to integrate both global and redox  
638 proteomics workflows into the same processing procedure from the same sample. The blocking  
639 and reduction strategies critical for measuring total oxidation of Cys sites were incorporated into  
640 a standard global proteomic processing workflow, ultimately allowing for both enrichment of  
641 oxidatively modified peptides and global proteomics from the same pool of peptide. The global  
642 proteomic data is used to calibrate the redox proteomics data in a similar manner as with  
643 phosphoproteomics data (Wu et al., 2011), to distinguish changes in Cys oxidation from changes  
644 in protein expression. Off-line reverse phase high pressure liquid chromatography fractionation  
645 of enriched redox peptides was implemented to increase coverage, as was recently demonstrated  
646 in one of our previous reports (Day et al., 2022). Total thiol channels were incorporated for a  
647 signal boosting strategy as described in (Day et al., 2022), as well as to provide enough peptide  
648 material for offline fractionation. B) Representative TMT18plex design. Muscle biopsy samples  
649 were randomly assigned different channels within a multiplex. A total of 4 plexes were generated  
650 to analyze 56 samples, where pooled samples were used to generate total thiol samples within  
651 each plex.

652 **Supplemental Figure S2.** Variation in muscle protein oxidation among participants.

653 Representative principal component analysis (PCA) plot of redox proteomics data with each data  
654 point (participant) colored by sex.

655 **Supplemental Figures S3-S10.** Heatmaps and correlation plots of all Cys sites that are  
656 significantly associated with the four phenotypes investigated. For the heatmaps (**Supplemental**  
657 **Figures S3, S5, S7, S9**), each row represents a Cys site with oxidation levels that are  
658 significantly associated with a phenotype, while each column represents a participant. Columns  
659 are ranked in descending order from left to right based on phenotypic measurement and the

660 phenotypic values are represented by median-centered Z-scores, while Cys oxidation levels were  
661 scaled by median-centering. Protein identities are in UniProt format. Sites passing an adjusted p  
662 value  $< 0.05$  cutoff are denoted by ‘\*’. For each signature (sub-cluster) in a heatmap, Cys sites  
663 were plotted for correlation analysis (**Supplemental Figures S4, S6, S8, S10**), where the mean  
664 level of oxidation across all Cys sites in a signature were plotted for each participant against their  
665 phenotypic measurement. *R* and *p* values are derived from Pearson correlation.

666

667 **Supplemental File S1.** Muscle sarcomere structure and contraction proteins investigated in this  
668 study.

669 **Supplemental File S2.** Results of linear regression analyses (limma) testing associations  
670 between protein Cys thiol oxidation sites and phenotypic measurements.

671 **Supplemental File S3.** Results of linear regression analyses (limma) testing associations  
672 between protein Cys thiol oxidation signatures and phenotypic measurements.

**Figure 1**

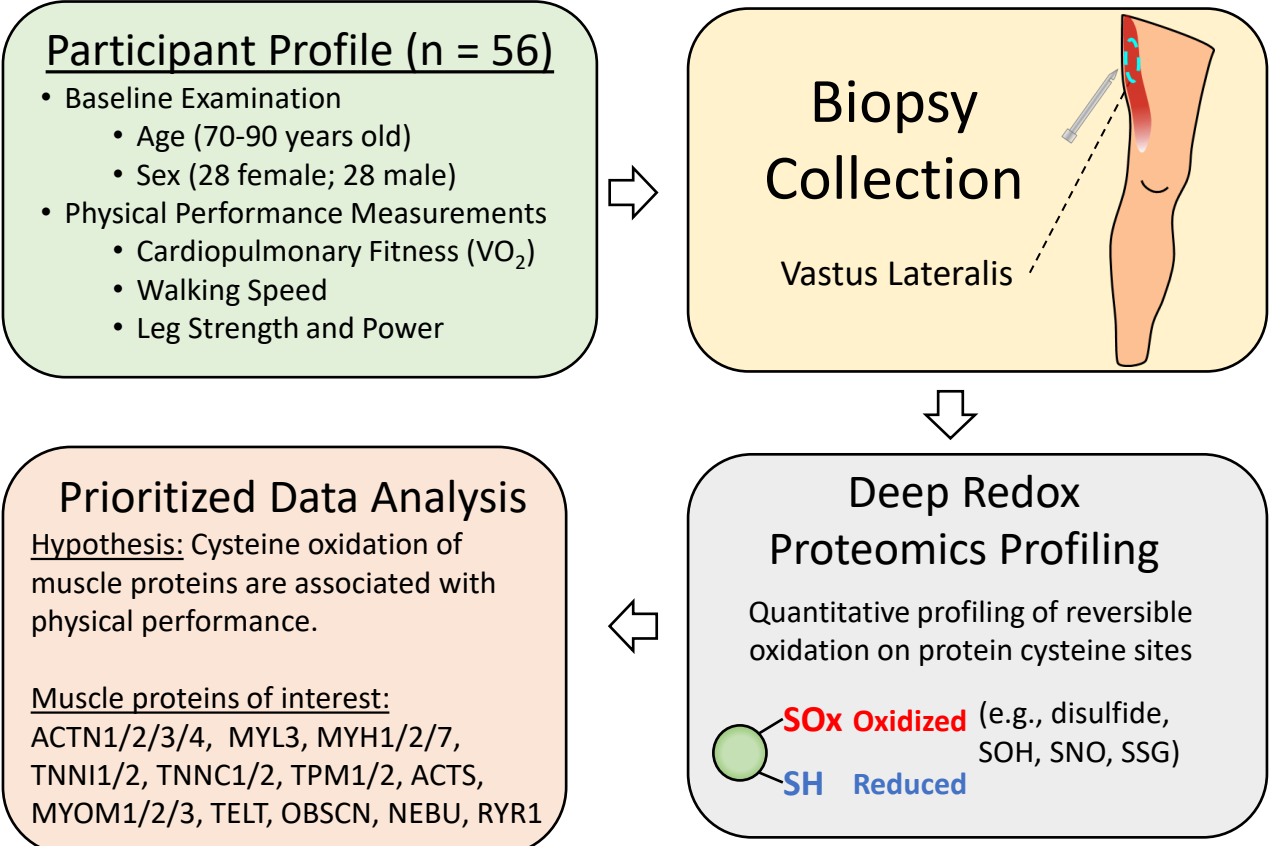

# Figure 2

## A) Cardiopulmonary Fitness (VO<sub>2</sub> Peak)

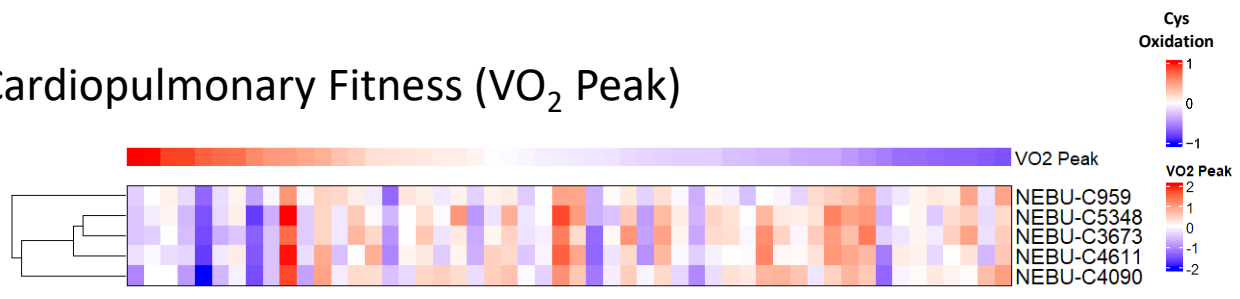

## B) Walking Speed

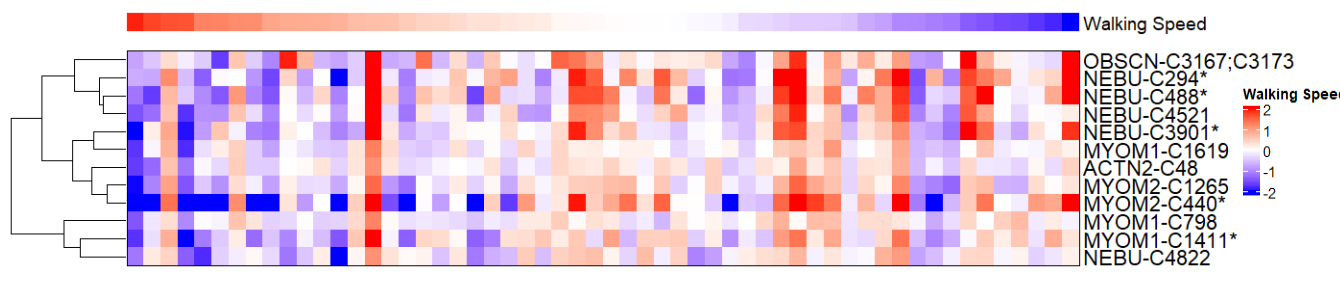

## C) Leg Strength

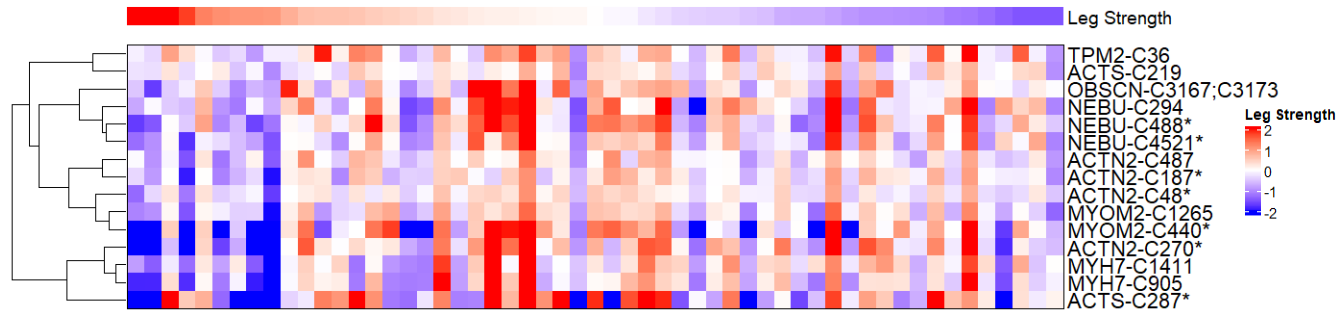

## D) Leg Power

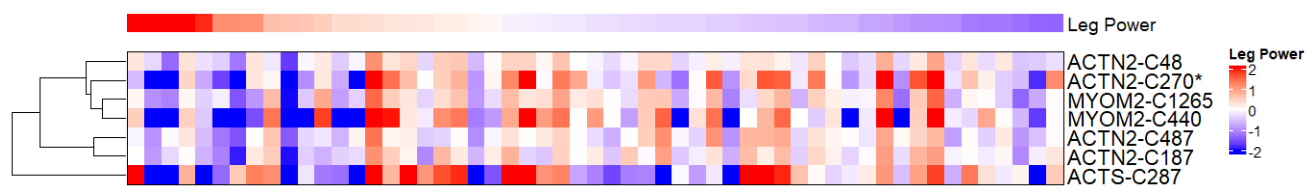

# Figure 3

## A) Cardiopulmonary Fitness (VO<sub>2</sub> Peak)    B) Walking Speed

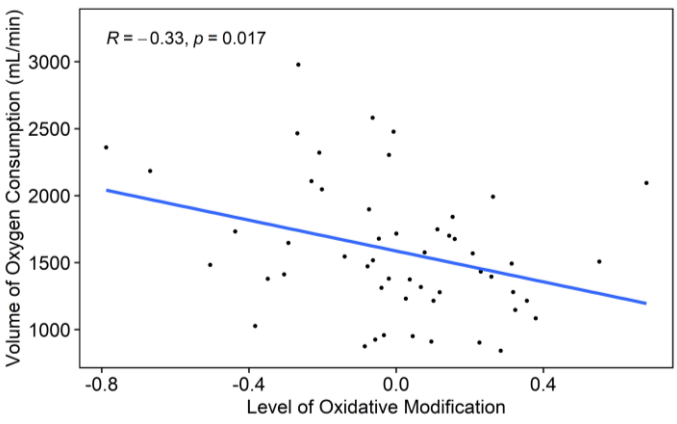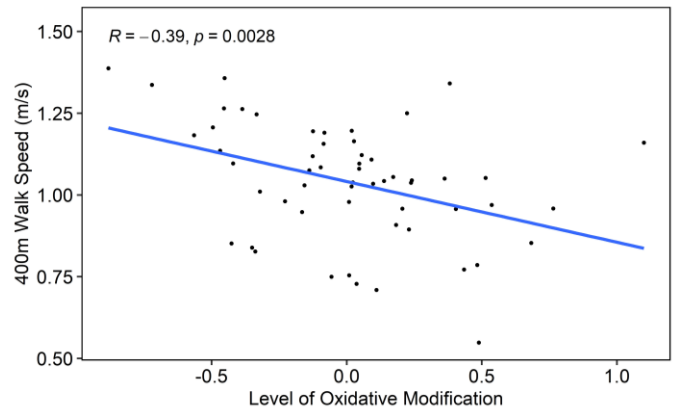

## C) Leg Strength

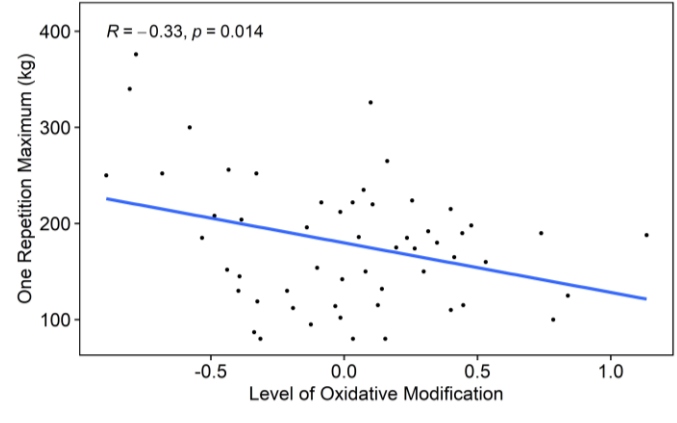

## D) Leg Power

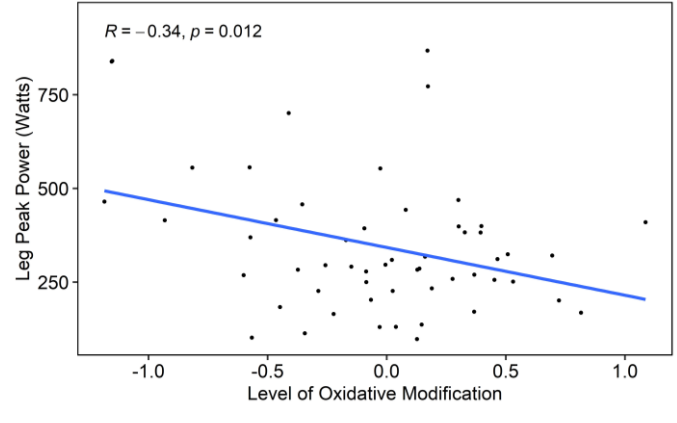



**Figure 4**

**A)**

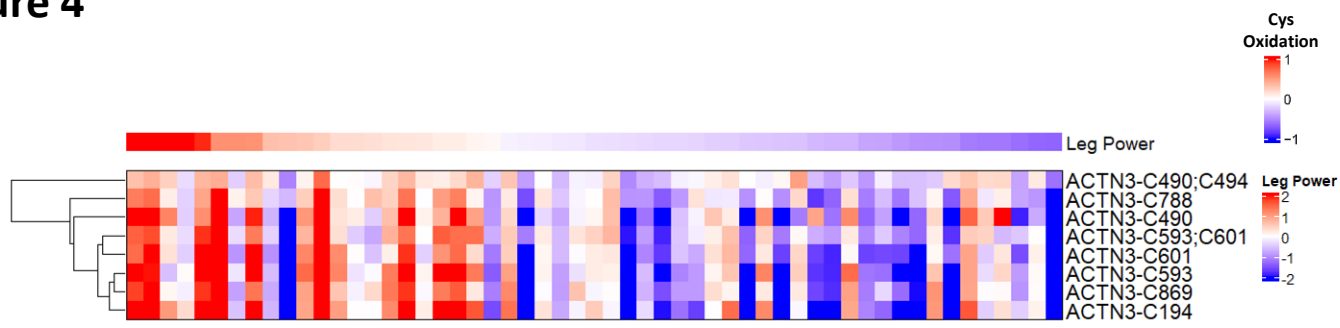

**B)**

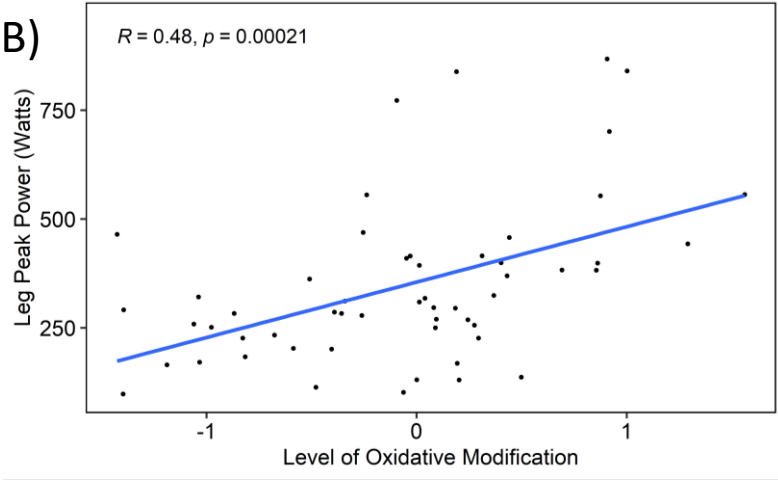

**C)**

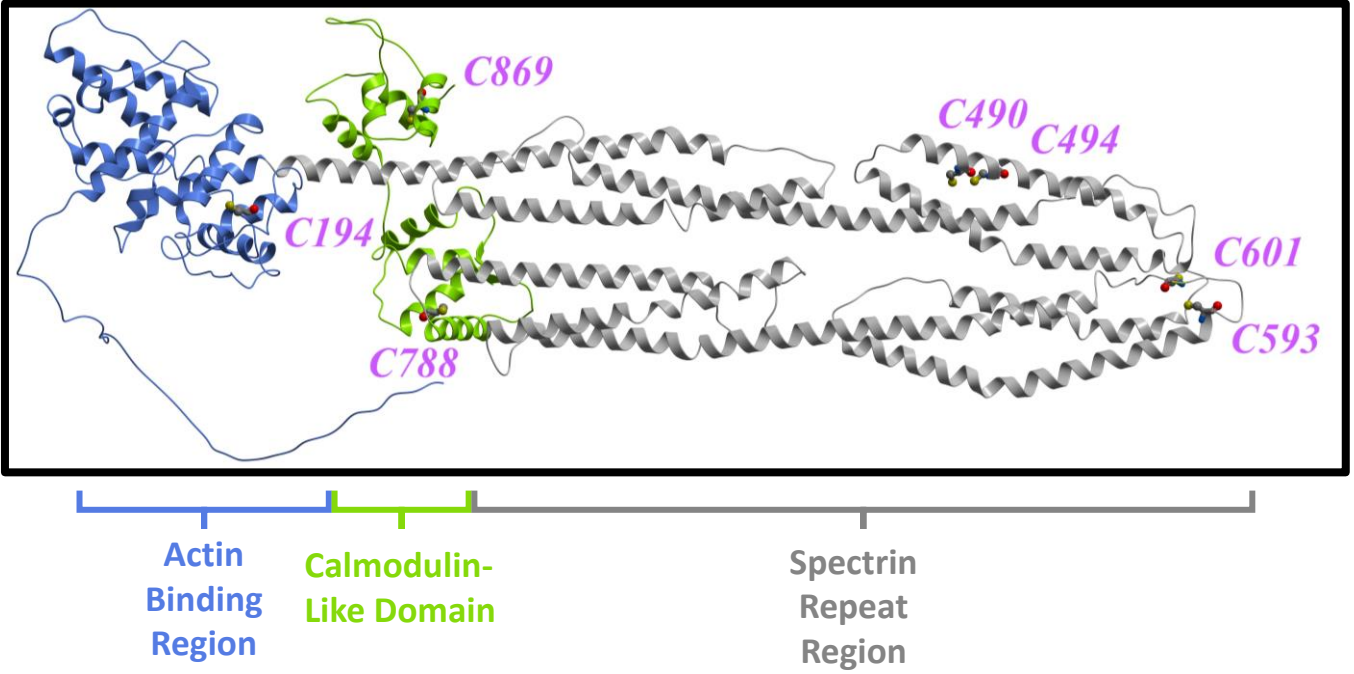

# Supplemental Figure S1

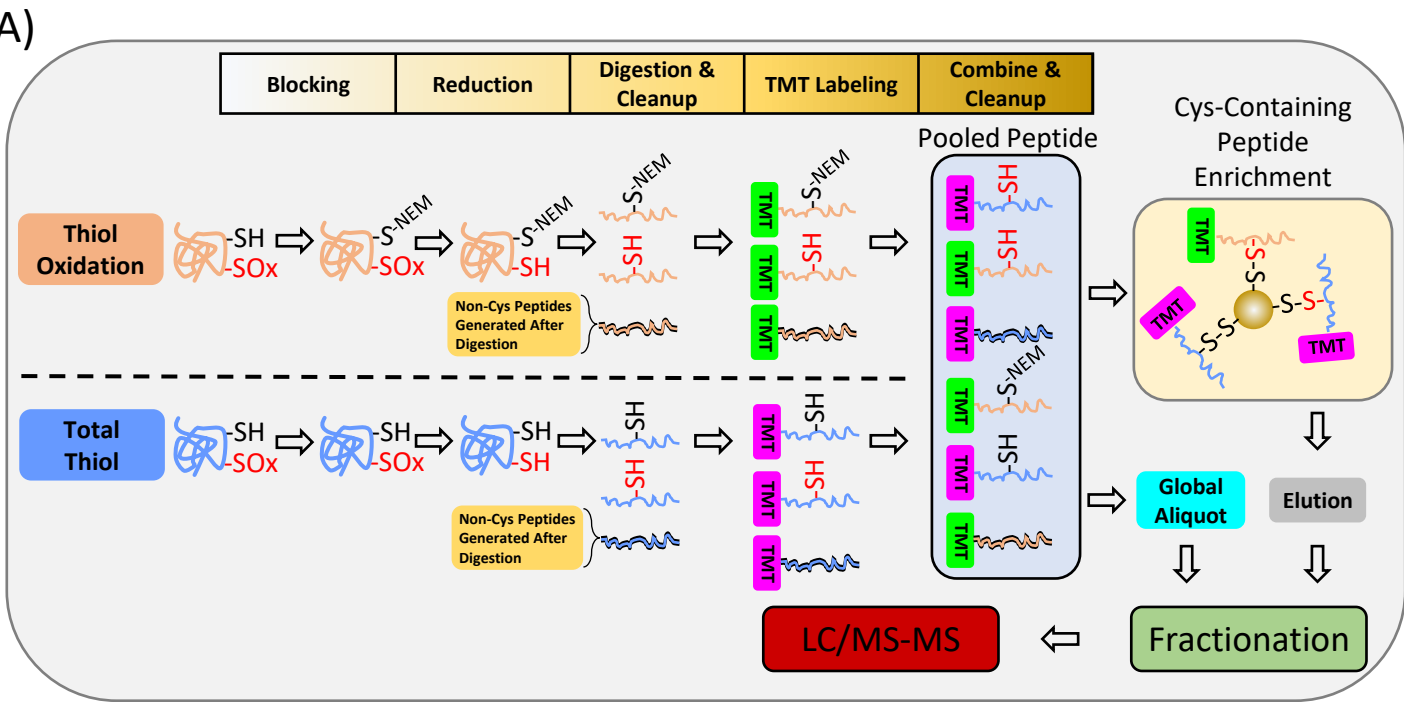

**B)**

| 126                    | 127N | 127C | 128N | 128C | 129N | 129C | 130N | 130C | 131N | 131C | 132N | 132C | 133N              | 134C | 135N |
|------------------------|------|------|------|------|------|------|------|------|------|------|------|------|-------------------|------|------|
| Total Oxidation (n=14) |      |      |      |      |      |      |      |      |      |      |      |      | Total Thiol (n=2) |      |      |

# Supplemental Figure S2

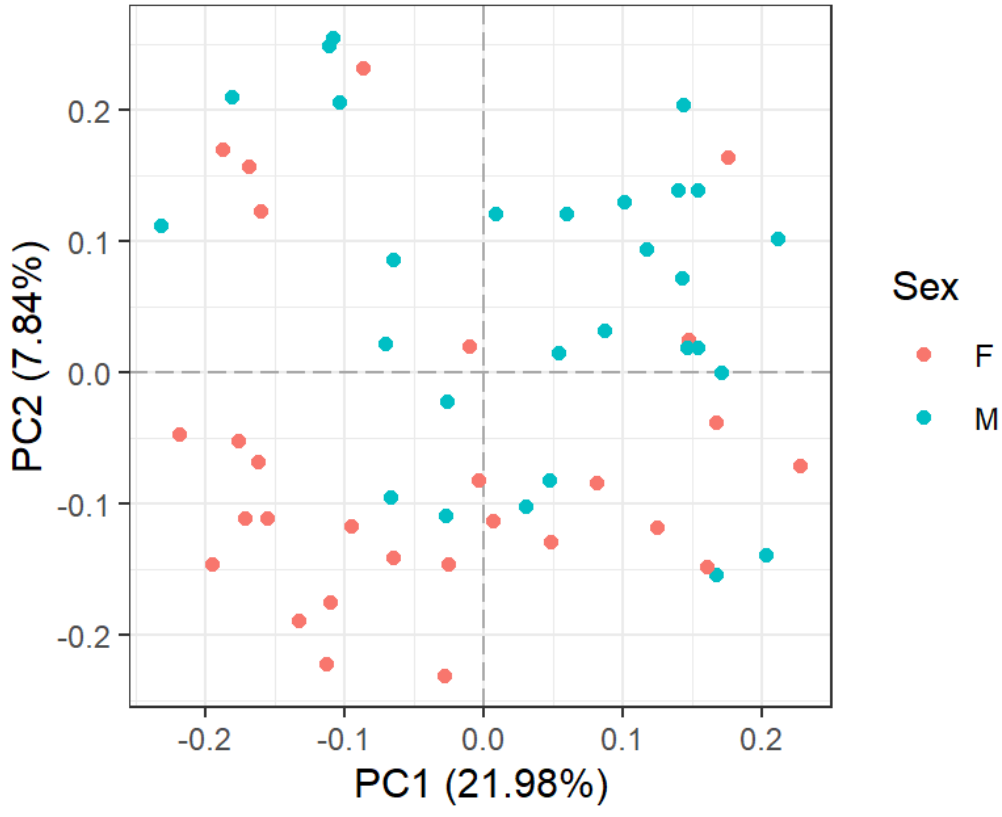

# Supplemental Figure S3

VO2 Peak (Volume of Oxygen Consumption at VO2 Peak, mL/min)

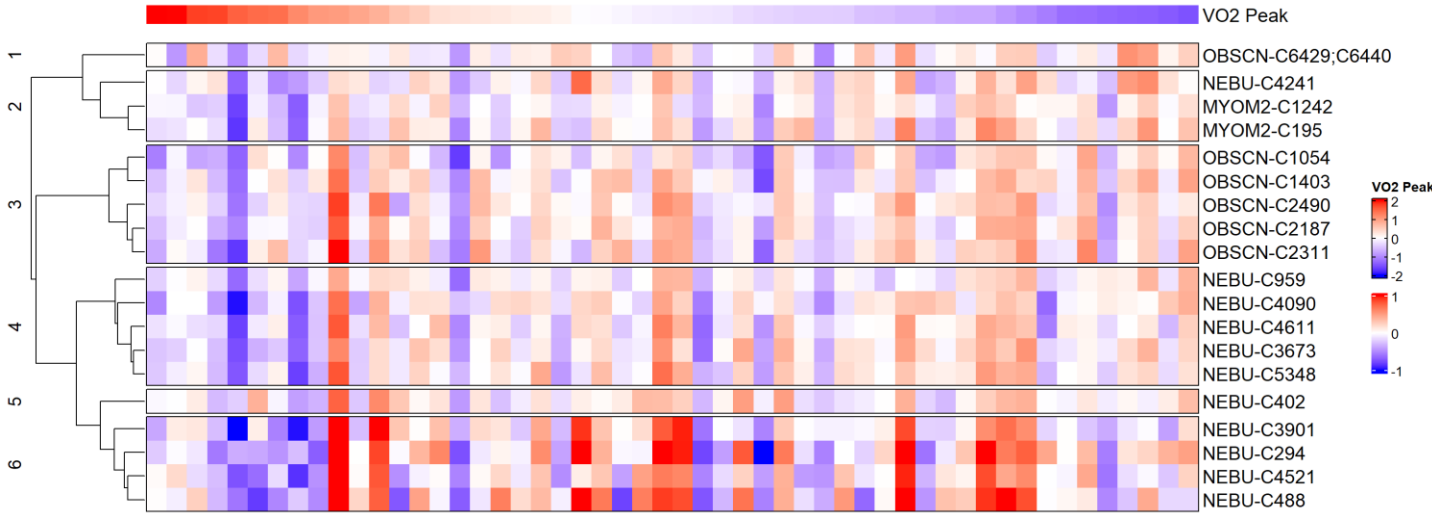

# Supplemental Figure S4

**A)** VO2 Peak, Cluster 1

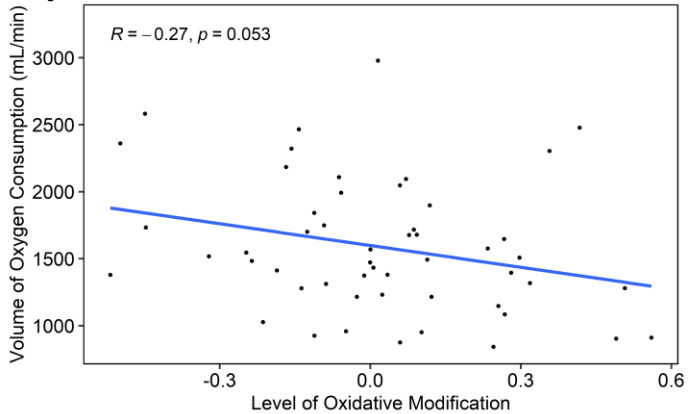

**B)** VO2 Peak, Cluster 2

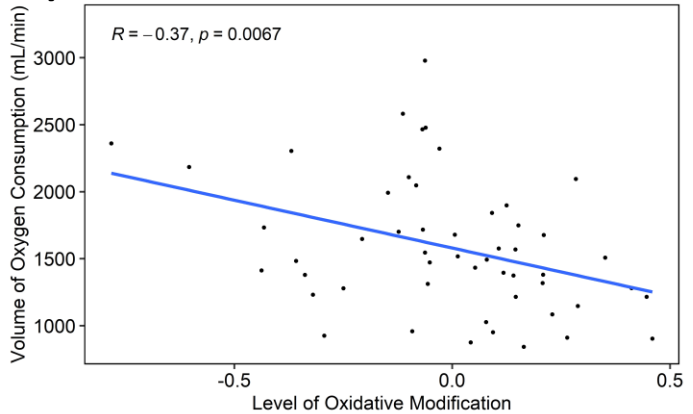

**C)** VO2 Peak, Cluster 3

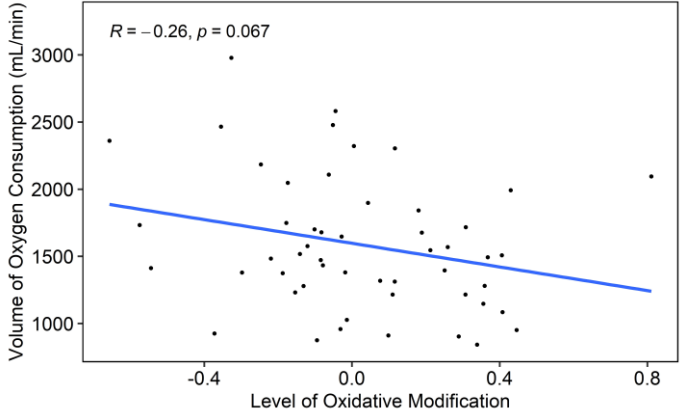

**D)** VO2 Peak, Cluster 4

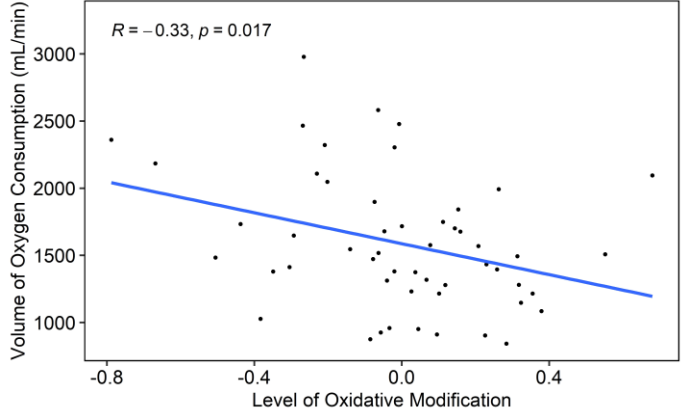

**E)** VO2 Peak, Cluster 5

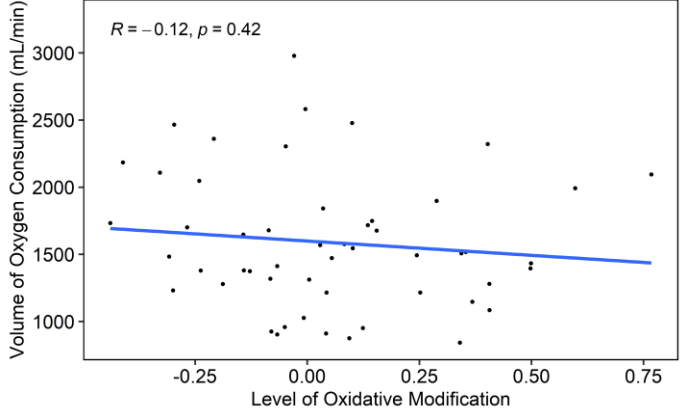

**F)** VO2 Peak, Cluster 6

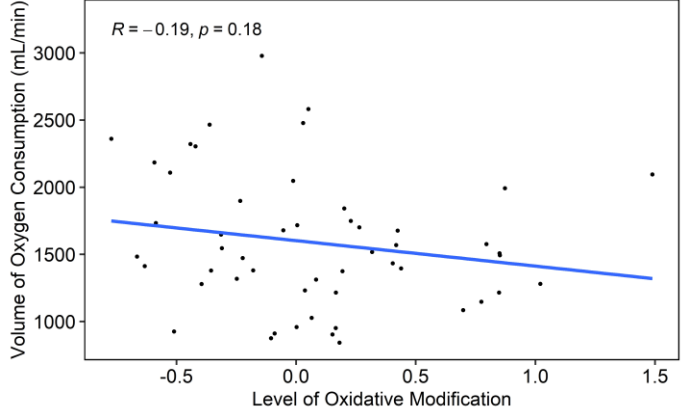

# Supplemental Figure S5

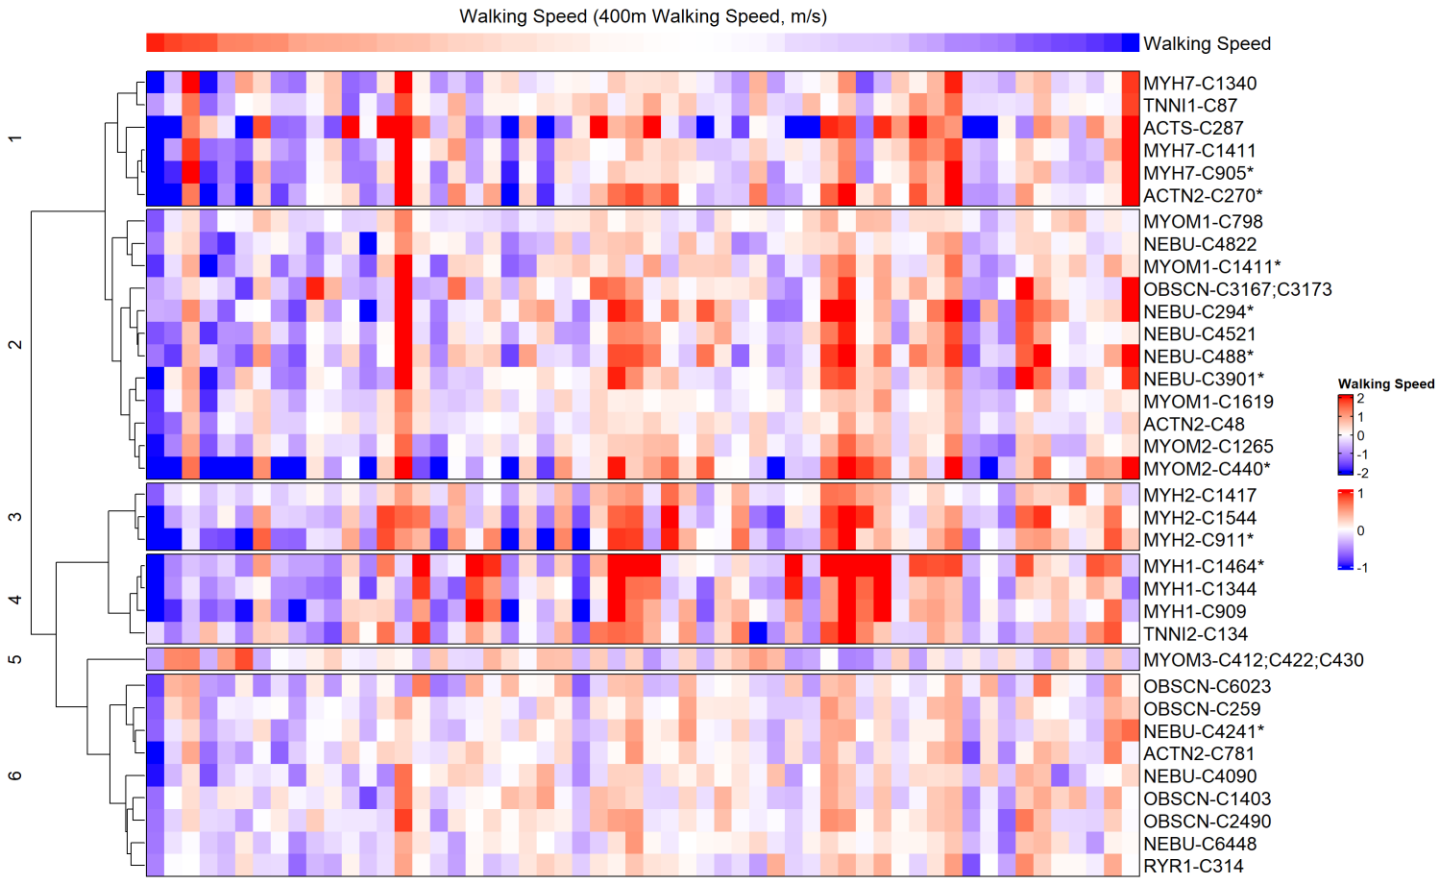

# Supplemental Figure S6

**A)** Walking Speed, Cluster 1

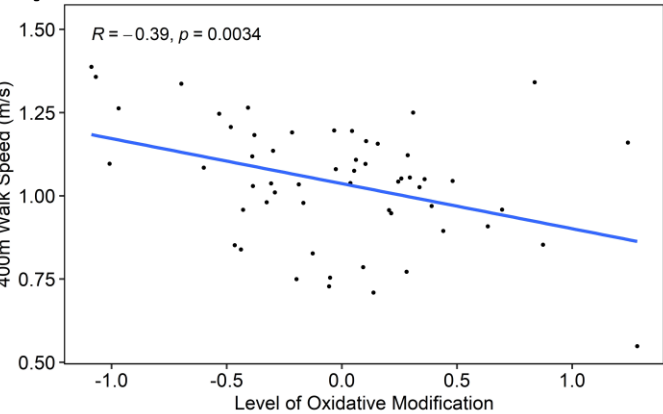

**B)** Walking Speed, Cluster 2

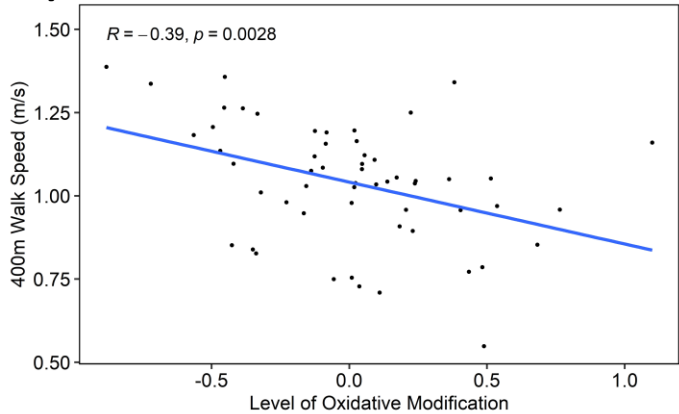

**C)** Walking Speed, Cluster 3

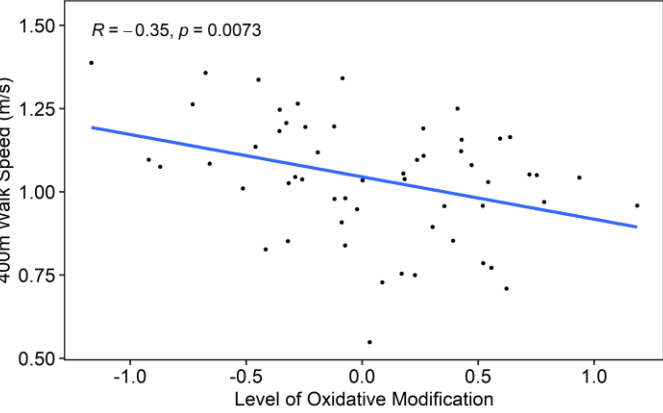

**D)** Walking Speed, Cluster 4

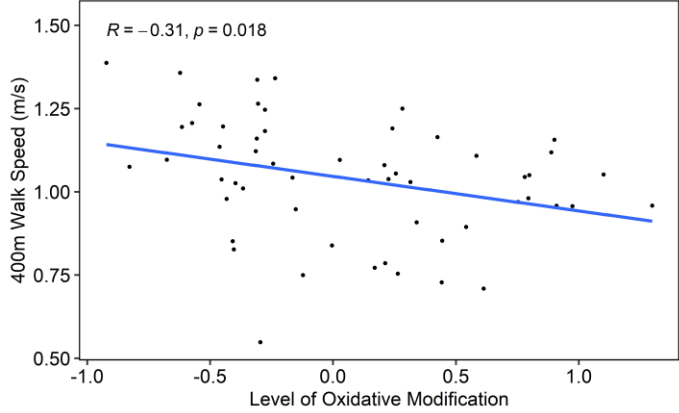

**E)** Walking Speed, Cluster 5

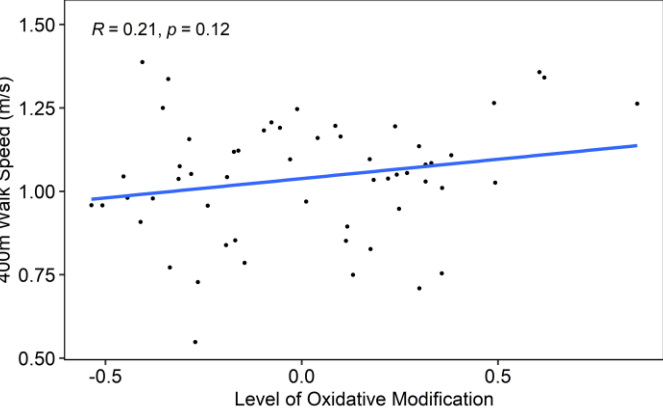

**F)** Walking Speed, Cluster 6

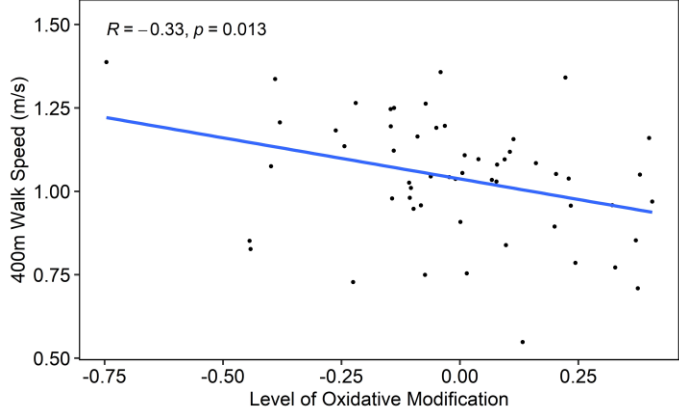

# Supplemental Figure S7

Leg Strength (One Repetition Maximum, kg)

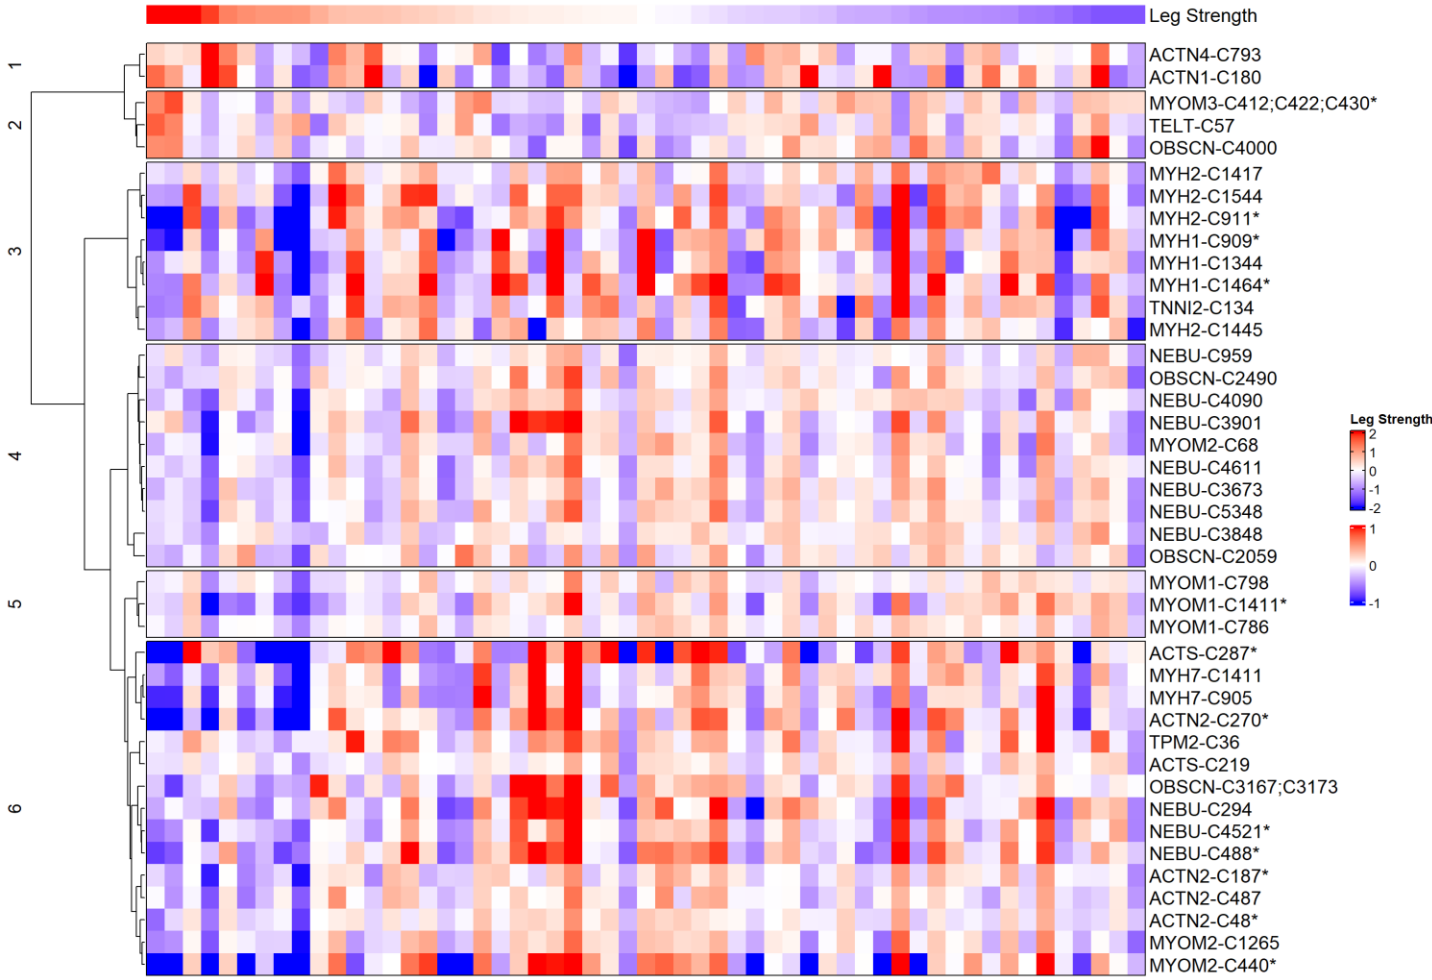



# Supplemental Figure S8

**A)** Leg Strength, Cluster 1

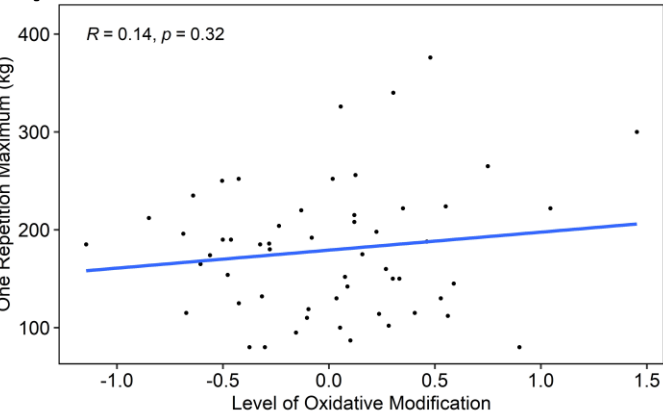

**B)** Leg Strength, Cluster 2

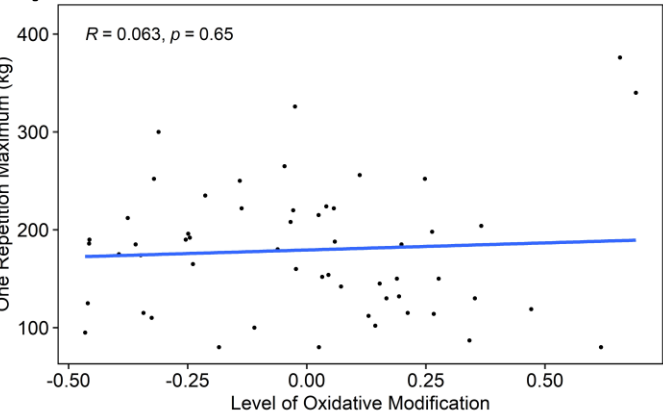

**C)** Leg Strength, Cluster 3

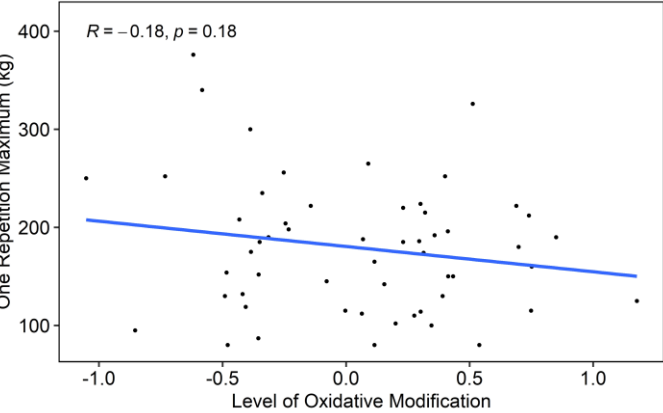

**D)** Leg Strength, Cluster 4

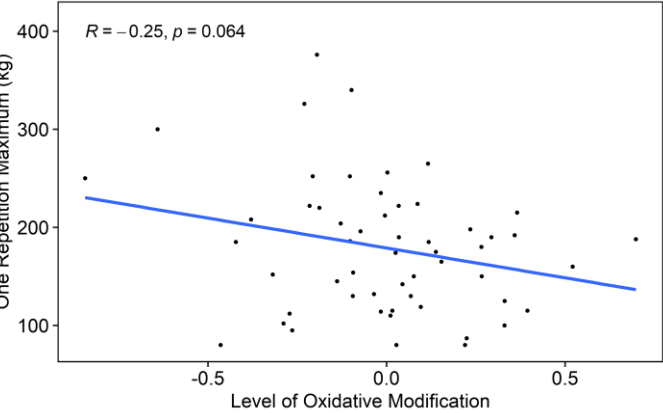

**E)** Leg Strength, Cluster 5

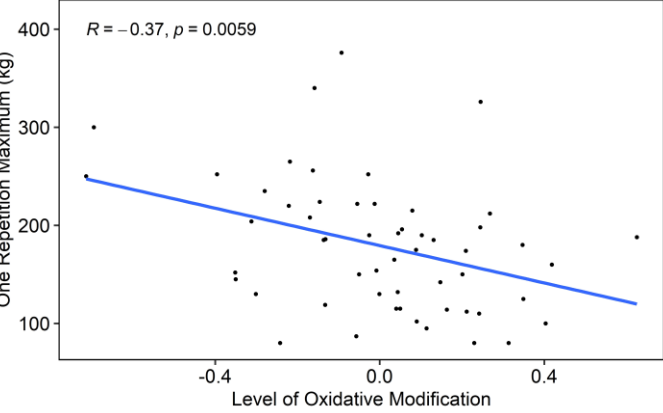

**F)** Leg Strength, Cluster 6

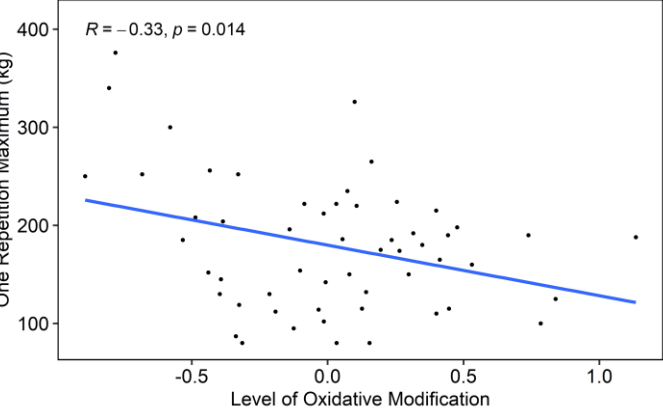

# Supplemental Figure S9

Leg Power (Highest Peak Power, Watts)

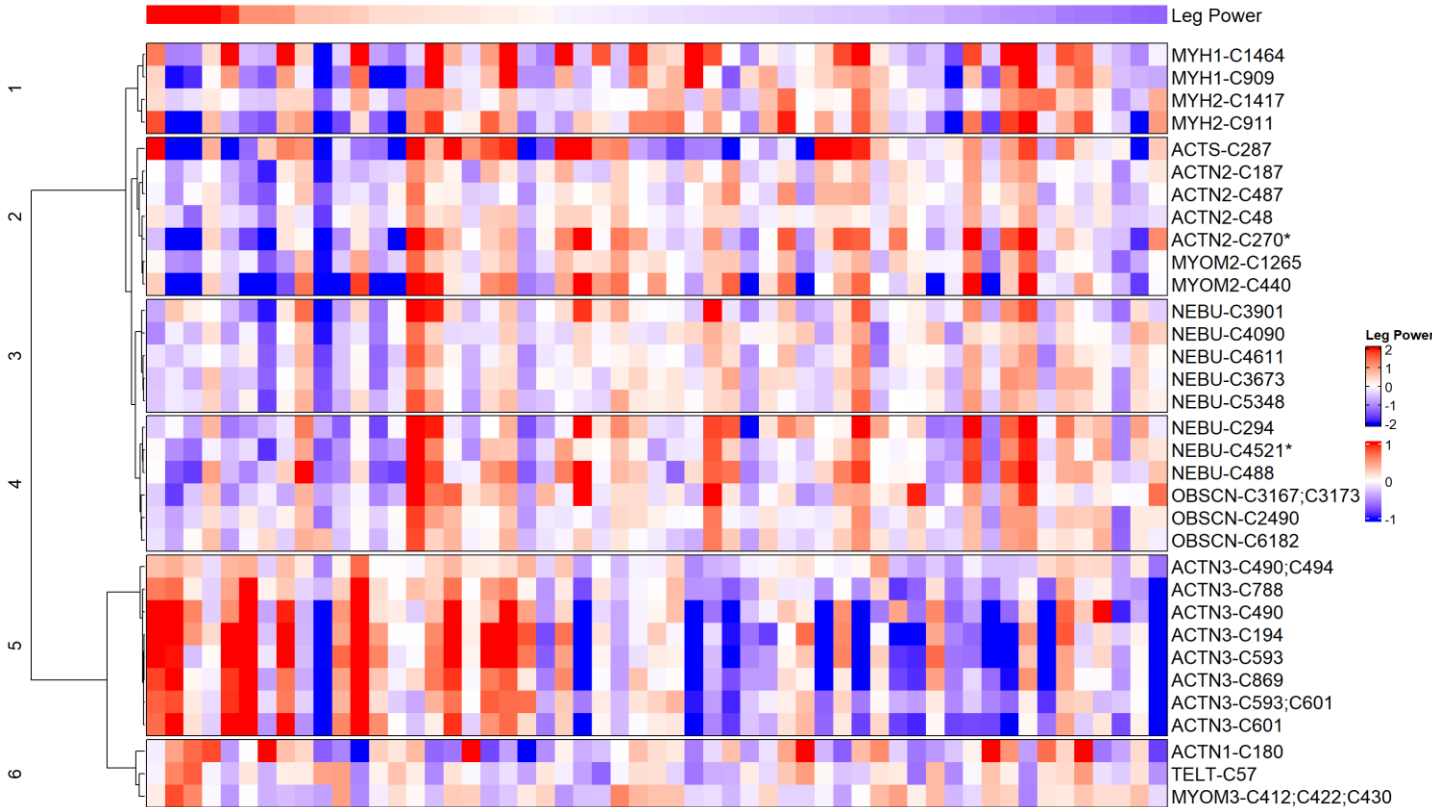

# Supplemental Figure S10

**A)** Leg Power, Cluster 1

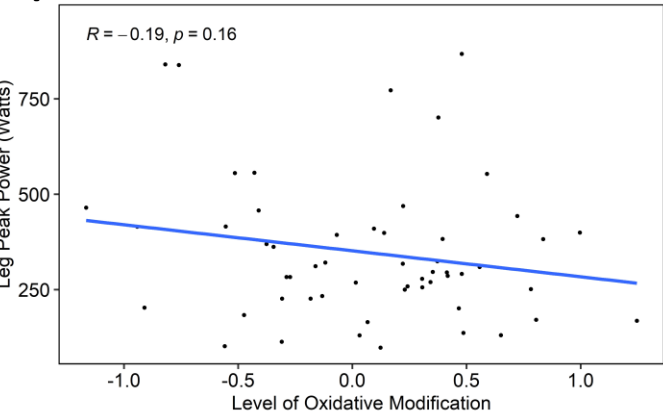

**B)** Leg Power, Cluster 2

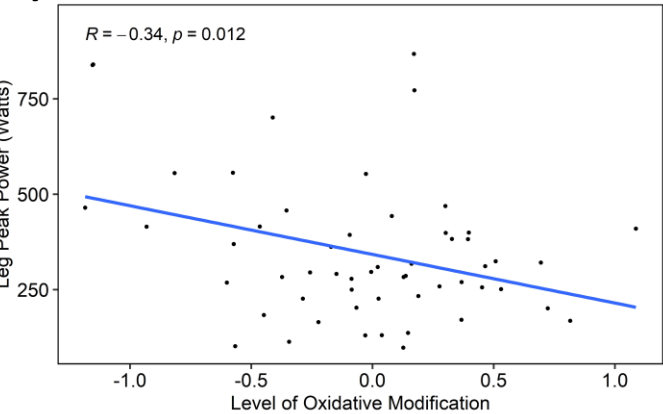

**C)** Leg Power, Cluster 3

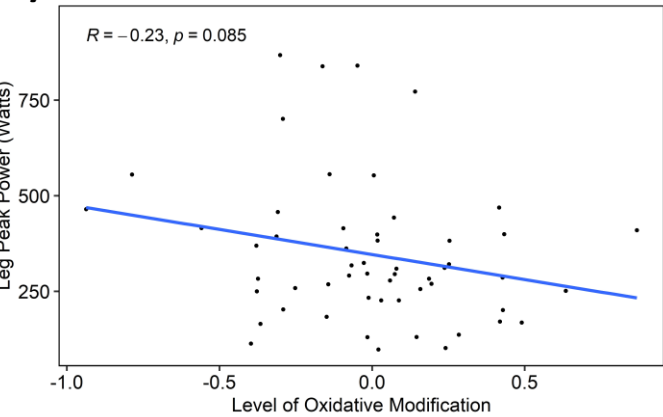

**D)** Leg Power, Cluster 4

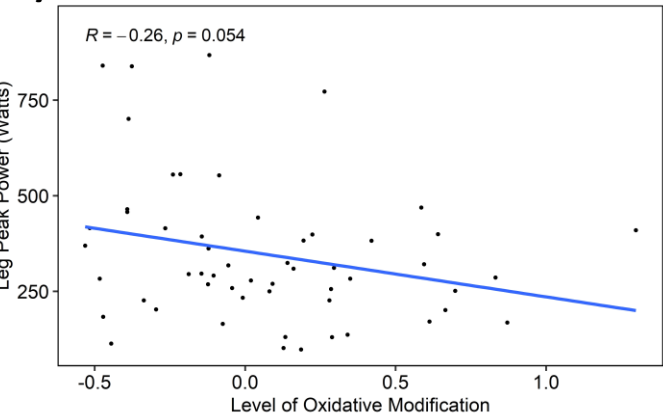

**E)** Leg Power, Cluster 5

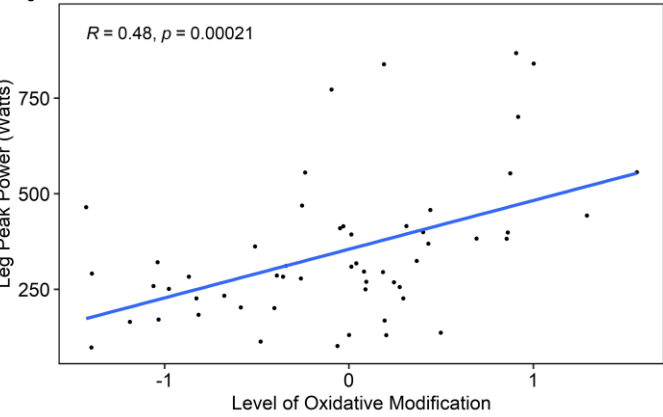

**F)** Leg Power, Cluster 6

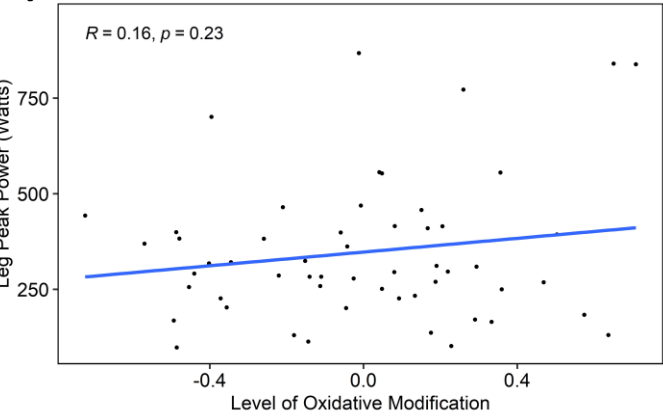

Source: https://medrxiv.org/content/10.1101/2023.11.07.23298224v1.full.pdf
